# Supplementary material for: The scope and limitation of the [1,4]-SPh shift in the synthesis of allylic alcohols†
Source: Royal Society of Chemistry journal article supplement (doi:10.1039/b005349j), 2000-01-01
Supplement: b005349j.doc [file b005349j.doc]

# Supplementary data

**The scope and limitation of the [1,4]-SPh shift in the synthesis of allylic alcohols**

**Varinder K. Aggarwal,*a,b* Jason Eames,**a,c* Maria A. de las Heras,*a* Sara McIntyre*a* and Stuart Warren**a***

*aUniversity Chemical Laboratory, Lensfield Road, Cambridge, UK CB2 1EW*

*bSchool of Chemistry, University of Bristol, Bristol, UK BS8 1TS*

*cDepartment of Chemistry, Queen Mary, University of London, Mile End Road, London, UK E1 4NS*

# Experimental

All solvents were distilled before use. Tetrahydrofuran (THF) and ether were freshly distilled from LiAlH4, whilst dichloromethane (CH2Cl2) and toluene were freshly distilled from CaH2. Triphenylmethane was used as the indicator for THF. n-BuLi was titrated against diphenylacetic acid before use. All reactions were carried out under nitrogen using oven-dried glassware. Flash column chromatography was carried out using Merck Kieselgel 60 (230-400 mesh). Thin layer chromatography (TLC) was carried out on commercially available pre-coated plates (Merck Kieselgel 60F254 silica). High performance liquid chromatography was carried out on Zorbax Sil and Dynamax columns. Proton and carbon NMR spectra were recorded on a Bruker WM 200, WM 250, WM400 or WM500 Fourier transform spectrometers using an internal deuterium lock. Chemical shifts are quoted in parts per million downfield of tetramethylsilane. Carbon NMR spectra were recorded with broad proton decoupling and Attached Proton Test (ATP). The symbol * after the carbon shift indicates an even number of attached protons; i.e., CH2 or quaternary carbons. Mass spectra were recorded on a AEI Kratos MS30 or MS890 machine using a DS503 data system for high resolution analysis.

**Methyl-3-[(1'-phenylsulfanyl)cyclohexyl]-prop-2-enoate (*E*)-10**

Phosphonium ylide **9** (0.41 g, 0.99 mmol) was added to a solution of aldehyde **8** (0.2 g, 0.9 mmol) in toluene (5 ml). The solution was refluxed overnight. The solvent was removed under reduced pressure. Saturated NH4Cl (10 ml) was added and the solution was extracted with ether (3 × 50 ml). The combined organic extracts were dried (MgSO4) and evaporated under reduced pressure. The residue was purified by flash column chromatography on silica gel eluting with light petroleum (40-60 oC)-ether (9:1) to give the *ester* (*E*)-**10** (0.24 g, 90 %) as a colourless oil; *R*f [light petroleum (40-60 oC)-ether (9:1)] 0.4; *v*max(film, CDCl3)/cm-1 1725 (CO2); H(250 MHz, CDCl3) 7.38-7.22 (5 H, m, SPh), 6.85 (1 H, d, *J* 13.5, C*H*=CHCO2CH3), 5.19 (1 H, d, *J* 13.5, CH=C*H*CO2CH3), 3.71 (3 H, s, CH3) and 1.76-1.37 (10 H, m, 5 × CH2); C(100 MHz, CDCl3) 176.2* (C=O), 151.8 (*C*H=CHCO2CH3), 137.7 (*m*-SPh), 130.5* (*i*-SPh), 129.2 (*p*-SPh), 128.4 (*o*-SPh), 118.0* (*C*HCO2CH3), 53.6 (*C*SPh), 51.5* (OCH3), 35.0*, 25.7* and 22.5* (3 × CH2) (Found M+, 276.1182. C16H20O2S requires M, 276.1183); *m/z* 276.1 (60%, M), 245.1 (30, M – OCH3), 167.1 (100, M – SPh) and 135.1 (40, C2H2SPh).

**3-[(1'-Phenylsulfanyl)cyclohexyl]-2-en-prop-2-enol 11 and 3-[1'-(Phenylsulfanyl)cyclohexyl]-propanol 12**

LiBH4 (0.54 ml, 2 M in THF, 1.08 mmol) was added to a stirred solution of the ester (*E*)-**10** (0.1 g, 0.36 mmol) in THF (4 ml) at 0 oC. The solution was stirred for 2 hours and poured onto ice/brine. NaOH (2 ml, 10 %) was added and the solution was extracted with ether (3 20 ml). The combined organic extracts were dried (MgSO4) and evaporated under reduced pressure. The residue was purified by flash chromatography on silica gel eluting with light petroleum (40-60 oC)-ether (1:1) to give the *alcohol* **12**(20 mg, 24 %) as a colourless oil; *R*f [light petroleum (40-60 oC)-ether (1:1)] 0.45; *v*max(film, CDCl3)/cm-1 3200 (OH); H(250 MHz, CDCl3) 7.51-7.23 (5 H, m, SPh), 3.26 (2 H, t, *J* 7.21, C*H*2OH), 2.52 (1 H, br s, OH) and 1.89-1.0 (10 H, m, 5 × CH2); C(100 MHz, CDCl3) 137.7 (*m*-SPh), 129.1 (*p*-SPh), 128.8 (*o*-SPh), 67.0* (CH2OH), 56.9 (*C*SPh), 32.8*, 30.9*, 27.6*, 26.1* and 21.7* (5 × CH2); *m/z* 233.13 (10%, M – OH + H), 110.0 (100, PhSH) and 81.1 (20, C6H9); and the *allylic alcohol* **11** (61 mg, 72 %) as a colourless oil; *R*f [light petroleum (40-60 oC)-ether (1:1)] 0.4; *v*max(film, CDCl3)/cm-1 3200 (OH); H(250 MHz, CDCl3) 7.58-7.24 (5 H, m, SPh), 5.61 (1 H, dd, *J* 15.8 and 1.1, C*H*=CHCH2), 5.12 (1 H, dt, *J* 15.8 and 7.5, CH=C*H*CH2), 4.02 (2 H, broad doublet, *J* 7.5, CH2O) and 1.79-1.32 (11 H, m, 5 × CH2 and OH).

**3-Cyclohexenyl-1-(phenylsulfanyl)-propane 14**

Toluene-*p*-sulphonyl chloride (7.68 mg, 40 mol) was added to a stirred solution of alcohol **12** (10 mg, 40 mol) in pyridine (1 ml). The solution was stirred for 12 hours. Ether (20 ml) was added and the solution was extracted with HCl (10 ml, 3 M) and evaporated under reduced pressure. The residue was purified by flash chromatography on silica gel column with light petroleum (40-60 oC)-ether (1:1) to give the *sulfide* **14** (8.6 mg, 93 %) as a colourless oil; *R*f [light petroleum (40-60 oC)-ether (1:1)] 0.65; *v*max(film, CDCl3)/cm-1 1580 (SPh); H(250 MHz, CDCl3) 7.47-7.17 (5 H, m, SPh), 5.40 (1 H, broad s, CH=C), 2.90 (2 H, t, *J* 7.4, CH2SPh) and 2.18-1.4 (12 H, m, 6  CH2); C(62.5 MHz, CDCl3) 136.5* (*i*-SPh and *C*=CH), 128.8 (*m*-SPh), 128.6 (*o*-SPh), 125.6 (*p*-SPh), 121.8 (*C*H=C), 36.9* (*C*H2SPh), 33.1*, 28.2* and 25.9* (3 × *C*H2C=C), 25.2*, 22.9* and 22.5* (3 × CH2) (Found M+, 232.1279. C15H30S requires M, 232.1285); *m/z* 238.1 (70%, M), 136.0 (100, M – C7H12), 122.1 (40, M – PhSH), 110.0 (30, PhSH) and 81.1 (60, C6H9).

**(2*RS*,3*RS*)-2-Methyl-1-cyclohexenyl-3-(phenylsulfanyl) propan-1-ol *anti*-17**

In the same way as the sulfide **14**, the diol *anti*-**15**9a(0.1 g, 0.35 mmol) and toluene-*p*-sulphonyl chloride (67 mg, 0.48 mmol) in pyridine (1 ml) gave, after flash column chromatography on silica gel eluting with light petroleum (40-60 oC)-ether (1:1), the *allylic alcohol anti-***17** (87 mg, 94 %) as a colourless oil; *R*f [light petroleum (40-60 oC)-ether (1:1)] 0.5; *v*max(film, CDCl3)/cm-1 3300 (OH); H(400 MHz, CDCl3) 7.36-7.12 (5 H, m, SPh), 5.66 (1 H, br s, CH=C), 3.78 (1 H, d, *J* 7.8, C*H*OH), 3.38 (1 H, dd, *J* 12.8 and 3.3, C*H*AHBS), 2.73 (1 H, dd, *J* 12.8 and 8.8, CHA*H*BS), 2.07-1.50 (9 H, m, 4  CH2 and C*H*CH3), 1.67 (1 H, s, OH) and 0.95 (3 H, d, *J* 6.8, C*H*3CH); C(100 MHz, CDCl3) 138.7* (*C*=CH), 137.4* (*i*-SPh), 129.7 (*m*-SPh), 129.4 (*o*-SPh), 125.9 (*p*-SPh), 125.5 (*C*H=C), 80.7 (CHO), 36.9* (CH2S), 36.2 (*C*HCH3), 25.0*, 23.4* and 22.6* (4  CH2) and 16.1 (*C*H3CH) (Found M+, 262.1389. C16H22OS requires M, 262.1391); *m/z* 262.1 (50%, M), 151.1 (40, C3H6SPh), 111.1 (75, C6H9CHO) and 69.0 (100, C5H9).

**Formation of the allylic alcohol *anti*-17under non-basic conditions.**

n-BuLi (0.38 ml, 1.15M in hexanes, 0.44 mmol) was added to a stirred solution of the diol *anti*-**15**9a (0.1 g, 0.42 mmol) in THF (10 ml) at –78 oC. The solution was stirred for 15 min. A solution of toluene-*p*-sulphonyl chloride (84 mg, 0.44 mmol) in THF (1 ml) was slowly added and the solution was stirred for a further 2 h. Saturated NH4Cl (5 ml) was added and the solution was extracted with ether (3 × 30 ml). The combined organic extracts were dried (MgSO4) and evaporated under reduced pressure. The residue was purified by flash column chromatography on silica gel eluting with light petroleum (40-60 oC)-ether (1:1) to give the allylic alcohol *anti*-**17** (89 mg, 96 %) as a colourless oil, identical spectroscopically to that obtained previously.

**(2*RS*,3*SR*)-2-Methyl-1-cyclohexenyl-3-(phenylsulfanyl) propan-1-ol** ***syn*-17**

In the same way as the sulfide **14**, the diol *syn-***15**9a(41 mg, 146 mol) and toluene-*p*-sulfonyl chloride (31 mg, 146 mol) in pyridine (1 ml) gave, after flash column chromatography on silica gel eluting with hexane-ether (2:1) the *allylic alcohol* *syn*-**17** (32 mg, 79 %) as a colourless oil; *R*f [hexane-ether (2:1)] 0.53; *v*max(NaCl)/cm-1 3350 (OH) and 1580 (SPh); H(400 MHz; CDCl3) 7.48-7.13 (5 H, m, Ph), 5.68 (1 H, br s, CH=C-), 3.98 (1 H, d, *J* 5.7, C*H*OH), 3.05 (1 H, dd, *J* 12.9 and 5.8, C*H*AHBSPh), 2.71 (1 H, dd, *J* 12.9 and 7.8, CHA*H*BSPh), 2.14-1.93 (4H, m, C*H*2CH=CC*H*2), 1.67-1.48 (6 H, m, 2 × CH2, C*H*CH3 and OH) and 1.01 (3 H, d, *J* 6.7, CHC*H*3) (Found: M+, 262.1372. C16H22OS requires *M* 262.1391); *m/z* (EI) 262.1 (7%, M+), 111.1 (90, PhSH2) and 110.1 (100, PhSH).

**(2*RS*,3*RS*)-2-Methyl-1-cyclopentenyl -3-(phenylsulfanyl) propan-1-ol *anti*-20**

In the same way as the sulfide **14**, the diol *anti*-**18**9a(0.15 g, 0.56 mmol) and toluene-*p*-sulfonyl chloride (0.13 g, 0.63 mmol) in pyridine (2 ml) gave, after flash column chromatography on silica gel eluting with light petroleum (40-60 oC)-ether (1:1) the *allylic alcohol* *anti*-**20** (0.13 g, 95 %) as a colourless oil; *R*f [light petroleum (40-60 oC)-ether (9:1)] 0.15; *v*max(film, CDCl3)/cm-1 3300 (OH) and 1550 (SPh); H(200 MHz, CDCl3) 7.39-7.11 (5 H, m, SPh), 5.65 (1 H, br s, CH=C), 4.14 (1 H, d, *J* 5.0, C*H*OH), 3.32 (1 H, dd, *J* 11.2 and 4.5, C*H*AHBS), 2.74 (1 H, dd, *J* 11.2 and 9.0, CHA*H*BS), 2.41-2.13 (4 H, m, CH2C=C, C*H*AHBC=C and C*H*CH3), 2.00-1.79 (3 H, m, CH2 and CHA*H*BC=C) and 1.04 (3 H, d, *J* 7.5, C*H*3CH); C(50 MHz, CDCl3) 145.5 (*C*=CH), 133.0 (*i*-SPh), 128.8 (*o*- and *m*- SPh), 127.2 (*p*-SPh), 125.6 (*C*H=C), 75.1 (CHOH), 36.8 (*C*HCH3), 36.4 (CH2SPh), 32.0 and 31.0 (2 × *C*H2C=C), 23.3 (CH2) and 16.3 (C*H*3CH) (Found M+, 248.1239. C15H20OS requires M, 248.1234); *m/z* 248.1 (80%, M), 151.1 (70, C3H6SPh), 139.1 (50, M – SPh), 109.0 (60, PhS) and 97.1 (100, C5H7CHO + H).[[1]](#footnote-2)†

**(2*RS*,3*SR*)-2-Methyl-1-cyclopentenyl -3-(phenylsulfanyl) propan-1-ol *syn*-20**

In the same way as the sulfide **14**, the diol *syn*-**18**9a(0.15 g, 0.53 mmol) and toluene-*p*-sulfonyl chloride (0.12 g, 0.58 mmol) in pyridine (2 ml) gave, after flash column chromatography on silica gel eluting with light petroleum (40-60 oC)-ether (9:1) the *allylic alcohol* *syn*-**20** (0.14 g, 93 %) as a colourless oil; *R*f [light petroleum (40-60 oC)-ether (9:1)] 0.1; *v*max(film, CDCl3)/cm-1 1560 (SPh); H(200 MHz, CDCl3) 7.39-7.13 (5 H, m, SPh), 5.62 (1 H, s, CH=C), 4.39 (1 H, br s, C*H*OH), 3.08 (1 H, ABX, *J* 12.3 and 7.5, C*H*AHBS), 2.81 (1 H, double ABX, *J* 12.3 and 7.5, CHA*H*BS), 2.40-2.11 (5 H, m, 2 × CH2C=C and C*H*CH3), 1.96-1.78 (2 H, m, CH2), 1.70 (1 H, br s, OH) and 1.03 (3 H, d, *J* 6.5, C*H*3CH); C(50 MHz, CDCl3) 145.9 (*C*=CH), 136.8 (*i*-SPh), 129.2 (*m*-SPh), 128.8 (*o*-SPh), 125.8 (*p*-SPh), 125.7 (*C*H=C), 73.2 (CHOH), 37.8 (CH2S), 36.3 (*C*HCH3), 32.1 and 32.0 (2 × *C*H2C=C), 23.4 (CH2) and 13.5 (*C*H3CH) (Found M+, 248.1233. C15H20OS requires M, 248.1235); *m/z* 248.1 (10%, M), 139.1 (10, M – SPh), 109.0 (100, PhS), 97.1 (40, C5H8CHO), 77.0 (50, Ph) and 67.1 (70, C5H7).

**Synthesis of the diol** **3-hydroxy-[(1'-phenylsulfanyl)cyclopentyl]-propanol 21**

n-BuLi (6.4 ml, 1.3 M in hexanes, 8.33 mmol) Was added to diisopropylamine diisopropylamine (1.1 g, 1.47 ml, 10.9 mmol) in THF (50 ml) at –78oC. The solution was stirred for 30 mins. Ethyl acetate (0.7 g, 0.77 ml, 7.97 mmol) in THF (3 ml) was added slowly to this solution. The solution was stirred for 30 mins. The 1-phenylsulfanylcyclopentane carboxaldehyde (1.5 g, 7.25 mmol) in THF (10 ml) was added slowly. The solution was stirred for a further 30 mins. Saturated NH4Cl (20 ml) was added and the solution was allowed to warm to room temperature. The solution was extracted with ether (3  100 ml). The combined organic layers were dried (MgSO4) and evaporated under reduced pressure. The residue was purified was flash column chromatography on silica gel eluting with light petroleum (40-60oC)-ether (9:1) to give *ethyl-3-[(1'-phenylsulfanyl) cyclopentyl] propanoate*(2 g, 93 %) as an oil; *R*f [light petroleum (40-60oC)-ether (9:1)] 0.1; *v*max (film, CDCl3)/cm-1 3300 (OH) and 1750 (CO2); H(200 MHz, CDCl3) 7.59-7.26 (5 H, m, SPh), 4.18 (2 H, q, *J* 7.5, C*H*2CH3), 4.05 (1 H, dt, *J* 8.5 and 3.8, C*H*OH), 3.13 (1 H, d, *J* 3.8, OH), 2.91 (1 H, dd, *J* 13.2 and 3.8, C*H*AHBO), 2.57 (1 H, dd, *J* 13.1 and 8.5, CHA*H*BO), 2.01-1.56 (8 H, m, 4  CH2) and 1.29 (3 H, t, *J* 7.5, C*H*3CH2); C(50 MHz, CDCl3) 173.0 (C=O), 136.7 (*m*-SPh), 132.0 (*i*-SPh), 128.3 (*p*-SPh), 128.7 (*o*-SPh), 72.2 (CHOH), 65.2 (CH2O), 60.7 (*C*SPh), 37.9 (CH2CO2), 33.9, 33.9, 24.4 and 24.4 (4  CH2) and 14.14 (CH3).

LiAlH4 (0.57 g, 15.2 mmol) Was added to a stirred solution of the above ester (1.5 g, 5.06 mmol) in ether (100 ml) at 0oC. The solution was stirred for 2 hours and poured onto an ice/brine solution. NaOH (20 ml, 10%) was added and the solution was extracted with ether (3  100 ml). The combined organic layers were dried (MgSO4) and evaporated under reduced pressure. The residue was purified by flash column chromatography on silica gel eluting with ether to give the *diol* **21**(1.15 g, 91 %) as an oil; *R*f [ether] 0.45; *v*max (film, CDCl3)/cm-1 3600-3300 (OH); H(200MHz, CDCl3) 7.58-7.29 (5 H, m, SPh), 3.91-3.67 (3 H, m, CH2O and C*H*OH), 3.39 (1 H, d, *J* 2.7, OH), 2.74 (1 H, t, *J* 6.7, OH) and 2.01-1.49 (10 H, m, 5 × CH2); C(50 MHz, CDCl3) 136.8 (*m*-SPh), 131.6 (*i*-SPh), 129.0 (*p*-SPh), 128.8 (*o*-SPh), 74.9 (CHOH), 67.3 (*C*SPh), 62.1 (CH2O), 34.5, 33.3, 33.2, 24.9 and 24.6 (5 × CH2) (Found M+, 252.1183. C14H20O2S requires M, 252.1006); *m/z* 252.1 (5%, M), 177.1 (75, C5H8SPh), 143.1 (40, M — SPh), 109.0 (70, PhS), 77.1 (30, Ph) and 67.1 (C5H7).

**1-Cyclopentenyl-3-(phenylsulfanyl)-propan-1-ol 22**

In the same way as the sulfide **14**, the diol **21** (0.2 g, 0.78 mmol) and toluene-*p*-sulfonyl chloride (0.16 g, 0.78 mmol) in pyridine (1 ml) gave, after flash column chromatography on silica gel eluting with light petroleum (40-60 oC)-ether (9:1) the *allylic alcohol* **22** (0.17 g, 93 %) as a colourless oil; *R*f [light petroleum (40-60 oC)-ether (9:1)] 0.1; *v*max(film, CDCl3)/cm-1 3300 (OH) and 1550 (SPh); H(200 MHz, CDCl3) 7.40-7.15 (5 H, m, SPh), 5.64 (1 H, broad s, CH=C), 4.43 (1 H, t, *J* 7.6, C*H*OH), 3.02 (1 H, t, *J* 7.9, C*H*AHBS), 3.01 (1 H, t, *J* 7.9, CHA*H*BS), 2.41-2.23 (4 H, m, 2 × CH2C=C), 1.98-1.81 (4 H, m, 2 × CH2) and 1.71 (1 H, br s, OH); C(50 MHz, CDCl3) 146.3 (*C*=CH), 135.0 (*i*-SPh), 129.1 (*o*-SPh), 129.0 (*p*-SPh), 128.5 (*m*-SPh), 125.9 (*C*H=C), 70.1 (CHOH), 34.6 (CH2S), 32.1, 31.2, 29.8 and 23.3 (4 × CH2) (Found M+, 234.1074. C14H18OS requires M, 234.1078); *m/z* 234.1 (60%, M), 123.0 (CH2SPh), 137.0 (20, C2H4SPh), 110.0 (100, PhSH) and 67.1 (35, C5H7).

# Synthesis of diol 3-hydroxy-2,2-dimethy-[(1'-phenylsulfanyl)cyclopentyl]-propanol 23

n-BuLi (11.6 ml, 1.3 M in hexanes, 8.95 mmol) Was added to diisopropylamine (1.47 g, 1.98 ml, 14.5 mmol) in THF (50 ml) at –78oC. The solution was stirred for 30 mins. Ethyl isobutyrate (1.23 g, 1.41 ml, 10.6 mmol) in THF (3 ml) was added slowly to this solution. The solution was stirred for 30 mins. The The 1-phenylsulfanylcyclopentane carboxaldehyde(2 g, 9.7 mmol) in THF (10 ml) was added slowly. The solution was stirred for a further 30 mins. Saturated NH4Cl (20 ml) was added and the solution was allowed to warm to room temperature. The solution was extracted with ether (3  100 ml). The combined organic layers were dried (MgSO4) and evaporated under reduced pressure. The residue was purified was flash column chromatography on silica gel eluting with light petroleum (40-60oC)-ether (9:1) to give *ethyl-2,2-dimethyl-3-[(1'-phenylsulfanyl)cyclopentyl] propanoate*(2.53 g, 78 %) as an oil; *R*f [light petroleum (40-60 oC)-ether (9:1)] 0.1; *v*max (film, CDCl3)/cm-1 1750 (CO2); H(200MHz, CDCl3) 7.57-7.31 (5 H, m, SPh), 4.09-3.80 (3 H, m, C*H*OH and CH2O), 3.46 (1 H, d, *J* 5.2, OH), 2.12-1.35 (8 H, m, 4 × CH2), 1.31 (3 H, s, CH3), 1.28 (3 H, s, CH3) and 1.02 (3 H, t, *J* 7.2, C*H*3CH2); C(50MHz, CDCl3) 179.6 (C=O), 138.4 (*m*-SPh), 134.6 (*i*-SPh), 130.6 (*p*-SPh), 130.5 (*o*-SPh), 81.6 (CHOH), 70.9 (CH2O), 62.5 (*C*SPh), 48.3 (*C*CH3), 37.6 and 36.9 (2 × CH2), 27.9 and 25.6 (2 × *C*H3C), 25.3 and 23.1 (2 × CH2) and 15.5 (CH3) (Found M+, 322.1598. C18H26O3S requires M, 322.1602); *m/z* 322.2 (50%, M), 277.1 (80, M — OCH2CH2), 177.1 (85, C5H8SPh), 110.0 (40, PhSH) and 97.1 (100, C5H8CHO).

LiAlH4 (0.42 g, 11.2 mmol) Was added to a stirred solution of the above ester (1.25 g, 3.31 mmol) in ether (100 ml) at 0oC. The solution was stirred for 2 hours and poured onto an ice/brine solution. NaOH (20 ml, 10%) was added and the solution was extracted with ether (3  100 ml). The combined organic layers were dried (MgSO4) and evaporated under reduced pressure. The residue was purified by flash column chromatography on silica gel eluting with ether to give the *diol* **23**(0.88 g, 95 %) as an oil; *R*f [ether] 0.6; *v*max (film, CDCl3)/cm-1 3550-3300 (OH); H(200 MHz, CDCl3) 7.61-7.29 (5 H, m, SPh), 3.61 (1 H, d, *J* 3.6, OH), 3.48 (2 H, AB quartet, *J* 5.4, CH2O), 2.24 (1 H, dd, *J* 7.3 and 3.7, C*H*OH), 2.21-1.59 (9 H, m, 4 × CH2 and OH), 1.12 (3 H, s, CH3) and 0.91 (3 H, s, CH3); C (50 MHz, CDCl3) 136.3 (*m*-SPh), 132.4 (*i*-SPh), 128.7 (*o*- and *p*-SPh), 82.1 (CHOH), 74.1 (CH2O), 70.0 (*C*SPh), 40.2 (*C*CH3, But), 36.1 and 35.9 (2 × CH2), 24.9 (CH3), 23.6 and 23.3 (2 × CH2) and 20.5 (CH3) (Found M+, 280.1485. C16H24O2S requires M, 280.1496); *m/z* 280.1 (20%, M), 262.1 (25, M — H2O), 207.1 (70, C6H9OSPh + H), 177.1 (100, C5H8SPh) and 109.0 (30, PhS).

**Cyclopentenyl-2,2-dimethyl-3-(phenylsulfanyl)-propanol 24**

In the same way as the sulfide **14**, the diol **23** (0.16 g, 0.57 mmol) and toluene-*p*-sulfonyl chloride (0.13 g, 0.63 mmol) in pyridine (1 ml) gave, after flash column chromatography on silica gel eluting with light petroleum (40-60 oC)-ether (9:1) the *allylic alcohol* **24** (0.14 g, 95 %) as a colourless oil; *R*f [light petroleum (40-60 oC)-ether (9:1)] 0.15; *v*max(film, CDCl3)/cm-1 1590 (SPh); H(200 MHz, CDCl3) 7.39-7.13 (5 H, m, SPh), 5.64 (1 H, br s, CH=C), 4.29 (1 H, br s, C*H*OH), 3.05 (2 H, d, *J* 14.0, CH2S), 2.48-2.23 (4 H, m, 2 × CH2C=C), 1.93-1.78 (2 H, m, CH2), 1.70 (1 H, br s, OH), 1.06 (3 H, s, CH3) and 1.01 (3 H, s, CH3); C(50 MHz, CDCl3) 154.1 (*C*=CH), 138.0 (*i*-SPh), 128.9 (*p*-SPh), 128.7 (*m*- and *o*-SPh), 125.5 (CH=C), 67.8 (CHO), 44.5 (CH2S), 39.7 (*C*CH3), 33.9, 31.9 and 23.8 (3 × CH2), 23.8 and 22.8 (2 × CH3) (Found M+, 262.1388. C16H22OS requires M, 262.1391); *m/z* 262.1 (30%, M), 165.1 (100, M – C5H7CHO + H), 153.1 (25, M – SPh), 109.0 (40, PhS), 97.1 (95, C6H7O) and 67.1 (80, C5H7).

**Synthesis of diol 3-hydroxy-2,2-dimethyl-3-[(1'-phenylsulfanyl)cyclodecyl] propanol 25**

n-BuLi (2.6 ml, 1.3 M in hexanes, 3.38 mmol) Was added to diisopropylamine (0.43 g, 0.59 ml, 4.31 mmol) in THF (50 ml) at –78oC. The solution was stirred for 30 mins. Ethyl isobutyrate (0.37 g, 0.43 ml, 3.23 mmol) in THF (3 ml) was added slowly to this solution. The solution was stirred for 30 mins. The 1-phenylsulfanylcyclodecane carboxaldehyde(0.85 g, 3.07 mmol) in THF (10 ml) was added slowly. The solution was stirred for a further 30 mins. Saturated NH4Cl (20 ml) was added and the solution was allowed to warm to room temperature. The solution was extracted with ether (3  100 ml). The combined organic layers were dried (MgSO4) and evaporated under reduced pressure. The residue was purified was flash column chromatography on silica gel eluting with light petroleum (40-60oC)-ether (9:1) to give *ethyl-2,2-dimethyl-3-[(1'-phenylsulfanyl)cyclodecyl] propanoate*(0.59 g, 49 %) as an oil; *R*f [light petroleum (40-60oC)-ether (9:1)] 0.1; *v*max(film, CDCl3)/cm-1 3300 (OH) and 1700 (CO); H (200 MHz, CDCl3) 7.56-7.25 (5 H, m, SPh), 4.15 (2 H, q, *J* 7.1, CH2O), 3.76 (1 H, s, C*H*OH), 2.80 (1 H, s, OH), 1.93-1.47 (18 H, m, 9 × CH2), 1.25 (3 H, t, *J* 7.1, C*H*3CH2O), 1.22 (3 H, s, CH3) and 1.17 (3 H, s, CH3); C(50 MHz, CDCl3) 178.4 (CO), 137.2 (*m*-SPh), 130.5 (*i*-SPh), 128.7 (*p*-SPh), 128.5 (*o*-SPh), 73.4 (CHOH), 61.9 (*C*SPh), 60.7 (CH2O), 49.9 (*C*CH3), 30.9, 29.4, 29.1, 27.9, 27.6, 24.2, 23.9, 21.7 and 21.6 (9 × CH2), 25.0 (CH3), 21.23 (CH3) and 14.0 (*C*H3CH2) (Found C10H18SPh+, 247.1521. C16H23S requires M, 247.1520); *m/z* 247.1 (100%, C10H18SPh) and 110.0 (60, PhSH).

LiAlH4 (37 mg, 0.99 mmol) Was added to a stirred solution of the above ester (0.13 g, 0.33 mmol) in ether (100 ml) at 0oC. The solution was stirred for 2 hours and poured onto an ice/brine solution. NaOH (20 ml, 10%) was added and the solution was extracted with ether (3  100 ml). The combined organic layers were dried (MgSO4) and evaporated under reduced pressure. The residue was purified by flash column chromatography on silica gel eluting with ether to give the *diol* **25**(68 mg, 59 %) as an oil; *R*f [ether] 0.75; *v*max (film, CDCl3)/cm-1 3400-3300 (OH); H(200 MHz, CDCl3) 7.59-7.29 (5 H, m, SPh), 4.10-3.85 (2 H, m, C*H*OH and OH), 3.57-3.48 (2 H, m, CH2O), 1.93-1.41 (19 H, m, 9 × CH2 and OH), 1.21 (3 H, s, CH3) and 1.18 (3 H, s, CH3); *m/z* 247.2 (100%, C10H18SPh), 137.1 (40, C10H17) and 110.0 (100, PhSH).

The aldehyde 1-(phenylsulfanyl)cyclodecane carboxaldehyde was synthesised using de Groot and Jansen’s protocol.15

n-BuLi (26.2 ml, 1.3 M in hexanes, 34.1 mmol) Was added dropwise to a solution of methoxymethylphenylsulphide (5 g, 5 ml, 32.4 mmol) in THF (500 ml) at -78ºC and stirred for 30 min. Cyclodecanone (5 g, 5.26 ml, 32.4 mmol) in THF (5 ml) was added dropwise and the solution was stirred for a further 20 min. A solution of brine (50 ml) was added and the mixture was allowed to warm to room temperature. The solution was extracted with ether (3  50 ml) and the combined organic layers were dried (MgSO4) and evaporated under reduced pressure. The residue was purified by flash column chromatography on silica gel eluting with light petroleum (40-60 ºC)-ether (1:1) to *give 1-[methoxy(phenylsulfanyl)]-cyclodecanol*(7.8 g, 75 %) as an oil; *R*f [light petroleum (40-60oC)-ether (9:1)] 0.15; *v*max (film, CDCl3)/cm-1 3300 (OH); H(200 MHz, CDCl3) 7.49-7.22 (5 H, m, SPh), 4.56 (1 H, s, CHO), 3.42 (3 H, s, OCH3), 2.25 (1 H, broad s, OH) and 1.98-1.09 (18 H, m, 9 × CH2); C(62.5 MHz, CDCl3) 136.1* (*i*-SPh), 132.6 (*o*-SPh), 129.0 (*m*-SPh), 127.2 (*p*-SPh), 104.1 (CHO), 78.1* (COH), 64.4 (CH3O), 32.2*, 31.4*, 29.0*, 26.6*, 26.5*, 25.0*, 24.9*, 21.1* and 20.9* (9 × CH2); *m/z* 154 (100%, C19H18O), 109.0 (25, PhS) and 77.0 (10, Ph). Thionyl chloride (2.07 g, 1.3 ml, 17.5 mmol) was added dropwise to a solution of the above alcohol(1.8 g, 5.82 mmol) and Et3N (6.3 g, 8.5 ml, 62.3 mmol) in CH2Cl2 (200 ml) at 0ºC and stirred for 45 min. This solution was then poured into ice-cold hydrochloric acid (28 ml, 3 M) and extracted with CH2Cl2 (3  50 ml). The combined extracts were dried (MgSO4) and evaporated under reduced pressure. The residue was purified by flash column chromatography on silica gel, eluting with light petroleum (40-60 ºC)-ether (9:1) to give 1-(phenylsulfanyl)cyclodecane carboxaldehyde(1.89 g, 69 %) as an oil; *R*f [light petroleum (40-60oC)-ether (9:1)] 0.4; *v*max (film, CDCl3)/cm-1 1750 (CO); H(200 MHz, CDCl3) 9.84 (CHO), 7.39-7.20 (5 H, m, SPh) and 1.90-1.40 (18 H, m, 9 × CH2); C(50 MHz, CDCl3) 195.88 (CHO), 136.7 (*m*-SPh), 129.4 (*p*-SPh), 128.9 (*o*-SPh), 64.8 (*C*SPh), 26.9, 26.4, 25.5, 23.5 and 21.2 (5 × CH2) (Found M+, 276.1548. C17H24OS requires M, 276.1547); *m/z* 276.1 (5%, M), 247.2 (100, M — CHO) and 110.0 (35, PhSH).

**Cyclodecenyl-2,2-dimethyl-3-(phenylsulfanyl)-propanol (*E*)-26**

In the same way as the sulfide **14**, the diol **25** (0.11 g, 0.48 mmol) and toluene-*p*-sulfonyl chloride (0.1 g, 0.48 mmol) in pyridine (1 ml) gave, after flash column chromatography on silica gel eluting with light petroleum (40-60 oC)-ether (1:1) the *allylic alcohol* (*E*)-**26** (93 mg, 90 %) as a colourless oil; *R*f [light petroleum (40-60 oC)-ether (1:1)] 0.5; *v*max(film, CDCl3)/cm-1 1590 (SPh); H(200 MHz, CDCl3) 7.40-7.13 (5 H, SPh), 5.66 (1 H, br s, CH=C), 4.30 (1 H, br s, C*H*OH), 3.08 (2 H, AB quartet, CH2S), 2.40-2.20 (4 H, m, 2 × CH2C=C), 1.93-1.20 (12 H, m, 6 × CH2), 1.50 (1 H, br s, OH), 1.05 (3 H, s, CH3) and 1.02 (3 H, s, CH3); C(50 MHz, CDCl3) 154.2 (*C*=CH), 137.9 (*i*-SPh), 128.9 (*p*-SPh), 128.7 (*m*- and *o*-SPh), 125.5 (*C*H=C), 67.8 (CHO), 44.2 (CH2S), 39.7 (*C*CH3), 34.0, 33.9, 28.7, 28.7, 26.5, 25.1, 23.9 and 23.8 (8 × CH2), 23.8 and 22.8 (2 × CH3); *m/z* 332.1 (40%, M), 223.1 (100, M – SPh) and 109.0 (45, SPh).

# Synthesis of diol 3-hydroxy-2,2-dimethyl-[(1'-phenylsulfanyl)cyclobutyl]-propanol 27

n-BuLi (3.96 ml, 1.3 M in hexanes, 5.15 mmol) Was added to diisopropylamine (0.66 g, 0.89 ml, 6.56 mmol) in THF (50 ml) at –78oC. The solution was stirred for 30 mins. Ethyl isobutyrate (0.57 g, 0.65 ml, 4.92 mmol) in THF (3 ml) was added slowly to this solution. The solution was stirred for 30 mins. The 1-(phenylsulfanyl) cyclodecane carboxaldehyde(0.9 g, 4.68 mmol) in THF (10 ml) was added slowly. The solution was stirred for a further 30 mins. Saturated NH4Cl (20 ml) was added and the solution was allowed to warm to room temperature. The solution was extracted with ether (3  100 ml). The combined organic layers were dried (MgSO4) and evaporated under reduced pressure. The residue was purified was flash column chromatography on silica gel eluting with light petroleum (40-60oC)-ether (9:1) to give *ethyl-2,2-dimethyl-3-[(1'-phenylsulfanyl)cyclobutyl] propanoate*(1.28 g, 89 %) as an oil; *R*f [light petroleum (40-60oC)-ether (1:1)] 0.5; *v*max(film, CDCl3)/cm-1 3350 (OH) and 1700 (CO); H (200 MHz, CDCl3) 7.59-7.25 (5 H, m, SPh), 4.13 (1 H, AB quartet, *J* 8.4, CHO*H*), 4.08 (1 H, q, *J* 7.0, C*H*AHBO), 4.07 (1 H, q, *J* 7.0, CHA*H*BO), 3.85 (1 H, AB quartet, *J* 8.4, C*H*OH), 2.49-1.68 (6 H, m, 3  CH2), 1.37 (3 H, s, CH3), 1.22 (3 H, s, CH3) and 1.18 (3 H, t, *J* 7.2, C*H*3CH2); C(50 MHz, CDCl3) 178.0 (CO), 133.9 (*i*-SPh), 133.7 (*m*-SPh), 128.4 (*o*-SPh), 127.2 (*p*-SPh), 84.3 (CHOH), 60.8 (CH2O), 58.1 (*C*SPh), 45.6 (*C*CH3), 35.0, 31.7 and 25.0 (3 × CH2), 22.8, 16.4 and 16.6 (3 × CH3) (Found M+, 308.1445. C17H24O3S requires M, 308.1446); *m/z* 308.1 (30%, M), 280.1 (70, M — C2H4), 199.1 (20, M — SPh), 163.1 (80, C4H6SPh), 145.1 (60, M — C4H6SPh), 116.1 (100, PhSOH), 110.0 (40, PhSH) and 77.0 (20, Ph).

LiAlH4 (0.43 g, 11.7 mmol) Was added to a stirred solution of the above ester (1.2 g, 3.89 mmol) in ether (100 ml) at 0oC. The solution was stirred for 2 hours and poured onto an ice/brine solution. NaOH (20 ml, 10%) was added and the solution was extracted with ether (3  100 ml). The combined organic layers were dried (MgSO4) and evaporated under reduced pressure. The residue was purified by flash column chromatography on silica gel eluting with light petroleum (40-60oC)-ether (1:1) to give the *diol* **27**(0.94 g, 91 %) as an oil; *R*f [ether] 0.7; *v*max(film, CDCl3)/cm-1 3500-3350 (OH); H(400MHz, CDCl3) 7.72-7.30 (5 H, m, SPh), 3.85 (1 H, d, *J* 5.0, C*H*OH), 3.69 (1 H, d, *J* 11.0, C*H*AHBO), 3.44 (1 H, d, *J* 11.0, CHA*H*BO), 3.07-3.03 (1 H, broad s, OH), 2.94-2.84 (1 H, broad s, OH), 2.60-2.50 (1 H, m, C*H*AHB), 2.43-2.35 (1 H, m, CHA*H*B), 2.18-2.08 (2 H, m, CH2), 1.80-1.62 (2 H, m, CH2), 1.13 (3 H, s, CH3) and 1.05 (3 H, s, CH3); H(50 MHz, CDCl3) 135.4 (*m*-SPh), 132.0 (*i*-SPh), 128.6 (*o*-SPh), 128.0 (*p*-SPh), 83.9 (CHOH), 73.6 (CH2O), 59.35 (*C*SPh), 40.58 (*C*CH3), 34.66, 33.39 and 23.63 (3 × CH2), 20.63 (CH3) and 16.15 (CH3) (Found M+, 266.1338. C15H22O2S requires M, 266.1340); *m/z* 266.1 (30%, M), 193.1 (50, PhSC4H6CHO + H), 163.1 (100, C4H6SPh) and 110.0 (75, PhSH).

The aldehyde 1-(phenylsulfanyl)cyclobutane carboxaldehyde was synthesised using de Groot and Jansen’s protocol.15

n-BuLi (12.1 ml, 1.3 M in hexanes, 15.7 mmol) Was added dropwise to a solution of methoxymethylphenylsulphide (2.31 g, 2.31 ml, 15.0 mmol) in THF (500 ml) at -78ºC and stirred for 30 min. Cyclobutanone (1.0 g, 1.06 ml, 14.3 mmol) in THF (5 ml) was added dropwise and the solution was stirred for a further 20 min. A solution of brine (50 ml) was added and the mixture was allowed to warm to room temperature. The solution was extracted with ether (3  50 ml) and the combined organic layers were dried (MgSO4) and evaporated under reduced pressure. The residue was purified by flash column chromatography on silica gel eluting with light petroleum (40-60 ºC)-ether (1:1) to *give 1-[methoxy(phenylsulfanyl)]-cyclobutanol* (3.2 g, 100 %) as an oil; *R*f [light petroleum (40-60oC)-ether (9:1)] 0.1; *v*max (film, CDCl3)/cm-1 3300 (OH) and 1550 (SPh); H(200 MHz, CDCl3) 7.59-7.25 (5 H, m, SPh), 4.65 (1 H, s, C*H*SPh), 3.52 (3 H, s, CH3O), 2.75 (1 H, s, OH) and 2.40-1.58 (6 H, m, 3 × CH2); C(50 MHz, CDCl3) 135.0 (*i*-SPh), 133.0 (*m*-SPh), 129.0 (*o*-SPh), 127.4 (*p*-SPh), 99.6 (*C*HSPh), 77.4 (COH), 57.3 (CH3O), 32.5, 32.1 and 12.4 (3 × CH2) (Found M+, 224.0869. C12H16O2S requires M, 224.0870); *m/z* 224.1 (20%, M), 192.1 (20, M — MeOH), 153.0 (80, PhSCHOMe), 115.1 (20, M — SPh), 110.0 (100, PhSH) and 77.0 (10, Ph). Thionyl chloride (5.09 g, 3.18 ml, 42.8 mmol) was added dropwise to a solution of the above alcohol(3.2 g, 14.28 mmol) and Et3N (15.3 g, 20.7 ml, 0.15 mol) in CH2Cl2 (200 ml) at 0ºC and stirred for 45 min. This solution was then poured into ice-cold hydrochloric acid (28 ml, 3 M) and extracted with CH2Cl2 (3  50 ml). The combined extracts were dried (MgSO4) and evaporated under reduced pressure. The residue was purified by flash column chromatography on silica gel, eluting with light petroleum (40-60 ºC)-ether (9:1) to give 1-(phenylsulfanyl)-cyclobutane-carboxaldehyde(1.89 g, 69 %) as an oil; *R*f [light petroleum (40-60oC)-ether (9:1)] 0.5; *v*max (film, CDCl3)/cm-1 1750 (CO); H(200 MHz, CDCl3) 9.41 (1 H, s, CHO), 7.28 (5 H, broad s, SPh) and 2.68-2.20 (6 H, m, 3 × CH2); C(50 MHz, CDCl3) 195.7 (CHO), 132.1 (*i*-SPh), 131.9 (*m*-SPh), 129.0 (*o*-SPh), 127.8 (*p*-SPh), 57.2 (*C*SPh), 28.2 and 15.7 (2 × CH3) (Found M+, 192.0607. C11H12OS requires M, 192.0608); *m/z* 192.1 (40%, M), 163.1 (50, M — CHO), 83.1 (5, M — SPh), 77.1 (15, Ph) and 69.0 (100, C5H9).

**3-Chloro-2,2-dimethyl-1-[(1'-phenylsulfanyl)cyclobutyl] propan-1-ol 29**

In the same way as the sulfide **14**, the diol **27** (0.11 g, 0.41 mmol) and toluene-*p*-sulfonyl chloride (86 mg, 0.41 mmol) in pyridine (1 ml) gave, after flash column chromatography on silica gel eluting with light petroleum (40-60 oC)-ether (1:1) the *chloride* **29** (0.1 g, 89 %) as a colourless oil; *R*f [light petroleum (40-60 oC)-ether (1:1)] 0.3; *v*max(film, CDCl3)/cm-1 3300 (OH); H(200 MHz, CDCl3) 7.68-7.25 (5 H, m, SPh), 3.82 (1 H, s, C*H*OH), 3.72 (1 H, AB quartet, *J* 10.6, C*H*AHBCl), 3.43 (1 H, AB quartet, *J* 10.6, CHA*H*BCl), 3.00-2.60 (1 H, br s, OH), 2.66-1.62 (6 H, m, 3 × CH2), 1.15 (3 H, s, CH3) and 1.00 (3 H, s, CH3); C(50 MHz, CDCl3) 135.5 (*m*-SPh), 133.3 (*i*-SPh), 128.7 (*o*-SPh)), 128.2 (*p*-SPh), 84.0 (CHOH), 73.8 (CH2Cl), 59.5 (*C*SPh), 40.7 (*C*CH3), 34.7, 33.5 and 23.7 (3  CH2), 20.7 (CH3) and 16.2 (CH3); *m/z* 248.1 (100%, M – HCl) and 109.0 (5, SPh).

**1-(3'-Thiolenyl)-3-(phenylsulfanyl)-propan-1-ol 31**

In the same way as the sulfide **14**, the diol **30**13(0.1 g, 0.37 mmol) and toluene-*p*-sulfonyl chloride (77 mg, 0.37 mmol) in pyridine (1 ml) gave, after flash column chromatography on silica gel eluting with light petroleum (40-60 oC)-ether (1:1) the *allylic alcohol* **31** (46 mg, 50 %) as a colourless oil; *R*f [light petroleum (40-60 oC)-ether (1:1)] 0.5; *v*max(film, CDCl3)/cm-1 3300 (OH); H(400 MHz, CDCl3) 7.35-7.18 (5 H, m, SPh), 5.75 (1 H, s, CH=C), 4.51 (1 H, t, *J* 5.6, C*H*OH), 3.78-3.61 (4 H, AB quartet, 2 × CH2S), 3.01 (1 H, t, *J* 6.2, C*H*AHBSPh), 3.00 (1 H, t, *J* 6.3, CHA*H*BSPh), 2.10 (1 H, br s, OH) and 1.93-1.84 (2 H, m, CH2); C(100 MHz, CDCl3) 145.2* (*C*=CH), 135.9* (*i*-SPh), 129.4 (*m*-SPh), 129.0 (*o*-SPh), 126.2 (*p*-SPh), 124.6 (CH=C), 69.6 (CHOH), 38.3* (CH2S), 37.4* (CH2S), 34.6* (*C*H2SPh) and 29.9* (CH2) (Found M+, 252.0639. C13H16OS4 requires M, 252.0643); *m/z* 252.0 (5%, M), 234.0 (10, M – H2O), 143.0 (10, M – SPh), 137.0 (5, C4H4SPh), 123.0 (20, CH2SPh), 109.0 (5, SPh), 85.0 (5, C4H5S) and 69.0 (100, C5H9).

**(2*SR*,3*SR*)-1-(3,6-Dihydro-2H-thian-4-yl)-2-methyl-3-thiophenyl-propan-1-ol *anti*-33; X=S**

In the same way as the sulfide **14**, the diol *anti*-**32**; X=S13 (85 mg, 0.28 mmol) and toluene-*p*-sulfonyl chloride (60 mg, 0.28 mmol) in pyridine (1 ml) gave, after flash column chromatography on silica gel eluting with light petroleum (40-60 oC)-ether (1:1) the *allylic alcohol anti*-**33**; X=S (67 mg, 84 %) as a colourless oil; *R*f [light petroleum (40-60 oC)-ether (1:1)] 0.45; *v*max(film, CDCl3)/cm-1 3300 (OH); H(400 MHz, CDCl3) 7.35-7.15 (5 H, m, SPh), 5.83 (1 H, br s, CH=C), 3.82 (1 H, d, *J* 5.3, C*H*OH), 3.35 (1 H, dd, *J* 12.9 and 3.4, C*H*AHBSPh), 3.24-3.09 (2 H, m, CH2S), 2.76 (1 H, dd, *J* 12.9 and 8.4, CHA*H*BSPh), 2.69 (2 H, t, *J* 5.4, CH2S), 2.40-2.29 (1 H, m, C*H*AHB), 2.16-2.07 (1 H, m, CHA*H*B), 1.98-1.91 (1 H, m, C*H*CH3), 1.80-1.74 (1 H, br s, OH) and 0.96 (3 H, d, *J* 6.8, C*H*3CH); C(100 MHz, CDCl3) 139.7* (*C*=CH), 137.1* (*i*-SPh), 128.9 (*m*-SPh), 128.7 (*o*-SPh), 125.7 (*p*-SPh), 121.5 (*C*H=C), 81.0 (CHOH), 36.8* (CH2S), 36.0 (*C*HCH3), 25.4*, 25.0* and 24.5* (CH2S, *C*H2SPh and CH2) and 16.4 (*C*H3CH); *m/z* 280.1 (20%, M) and 100.1 (100, C5H8S).

**(2*SR*,3*SR*)-1-(3,6-Dihydro-2H-pyran-4-yl)-2-methyl-3-thiophenyl-propan-1-ol *syn*-33; X=O**

In the same way as the sulfide **14**, the diol *syn-***32**; X=O13(0.1 g, 0.35 mmol) and toluene-*p*-sulfonyl chloride (80 mg, 0.39 mmol) in pyridine (1 ml) gave, after flash column chromatography on silica gel eluting with light petroleum (40-60 oC)-ether (9:1) the *allylic alcohol* *syn*-**33**; X=O (73 mg, 79 %) as a colourless oil; *R*f [light petroleum (40-60 oC)-ether (9:1)] 0.1; *v*max(NaCl)/cm-1 3406 (OH), 1581 (SPh); H(400 MHz; CDCl3) 7.36-7.34 (2 H, m, Ph), 7.33-7.25 (2 H, m, Ph), 7.20-7.15 (1 H, m, Ph), 5.69 (1 H, br s, CH=C), 4.16-4.15 (3H, m, OC*H*2CH=C and C*H*OH), 3.80-3.70 (2 H, m, CH2O), 3.02 (1 H, broad s, CHO*H*), 3.05 (1 H, dd, *J* 13.0 and 6.7, C*H*AHBS), 2.79 (1 H, dd, *J* 13.0 and 6.9, CHA*H*BS), 2.06-1.99 (1 H, m, OCH2C*H*AHB),1.94-1.80 (2 H, m, OCH2CHA*H*B and C*H*CH3), 0.99 (3 H, d, *J* 6.7, CH3); C(100 MHz; CDCl3) 136.6, 136.5, 129.0, 129.7, 126.1, 121.3, 76.1, 65.4, 64.1, 38.0, 35.6, 25.1, 13.5 (Found: M+, 264.1184. C15H20O2S requires *M* 264.1189); *m/z* (EI) 264 (65 %, M+), 155 (100, M+– SPh), 110 (90, SPh), 83 (40, C5H7O).

**(1*R*, 2*R*)-1-(3,6-Dihydro-2H-pyran-4-yl)-2-methyl-3-phenylthio-propan-1-ol *anti*-33; X=O**

In the same way as the sulfide **14**, the diol *anti-***32**; X=O13(10 mg, 35 mol) and toluene-*p*-sulfonyl chloride (8 mg, 39 mol) in pyridine (1 ml) gave, after flash column chromatography on silica gel eluting with light petroleum (40-60 oC)-ether (9:1) the *allylic alcohol* *syn*-**33**; X=O (6 mg, 64 %) as a colourless oil; *R*f [light petroleum (40-60 oC)-ether (9:1)] 0.1; *v*max(NaCl)/cm-1 3426 (OH) and 1580 (SPh); H(400 MHz; CDCl3) 7.33-7.35 (2 H, m, Ph), 7.27-7.24 (2 H, m, Ph), 7.16-7.13 (1 H, m, Ph), 5.68 (1 H, s, CH=C), 4.16-4.14 (2H, m, OC*H*2CH=), 3.88 (1 H, d, *J* 7.6, C*H*OH), 3.83-3.78 (1 H, ddd, *J* 10.9 and 5.4, CH2O), 3.75-3.68 (1 H, ddd, *J* 11.3, 6.9 and 4.5, CH2O), 3.32 (1 H, dd, *J* 12.9 and 3.6, C*H*AHBS), 2.75 (1 H, dd, *J* 12.9 and 8.4, CHA*H*BS), 2.14-2.09 (1 H, m, OCH2C*H*AHB), 1.99-1.91 (3H, m, OCH2CHA*H*B, C*H*CH3 and CHO*H*) and 0.98 (3 H, d, *J* 6.8, CH3), C(100 MHz; CDCl3) 137.0,136.7, 129.5, 128.9, 128.8, 125.7, 123.2, 79.3, 65.2, 64.2, 36.7, 36.0, 24.0, 16.4 (Found: M+, 264.1183. C15H22O3S requires M, 264.1183); *m/z*  (EI) 264 (20%, M+), 143 (100), 109 (30, SPh).

**(3*RS*, 4*SR*)-2,4-dimethyl-5-(phenylsulfanyl)-pent-1-en-3-ol *anti*-36**

In the same way as the sulfide **14**, the diol *anti*-**34**9b(0.1 g, 0.42 mmol) and toluene-*p*-sulfonyl chloride (91 mg, 0.42 mmol) in pyridine (1 ml) gave, after flash column chromatography on silica gel eluting with light petroleum (40-60 oC)-ether (1:1) the *allylic alcohol*  *anti*-**36**(79 mg, 85 %) as a colourless oil; *R*f [light petroleum (40-60 oC)-ether (9:1)] 0.15; *v*max(film, CDCl3)/cm-1 3200 (OH); H(400 MHz, CDCl3) 7.27-7.11 (5 H, m, SPh), 4.96 (1 H, m, C=C*H*AHB), 4.90 (1 H, quintet, *J* 1.5, C=CHA*H*B), 3.93 (1 H, dd, *J* 7.5 and 3.1, C*H*OH), 3.35 (1 H, dd, *J* 12.8 and 3.2, C*H*AHBSPh), 2.75 (1 H, dd, *J* 12.8 and 8.7, CHA*H*BSPh), 2.01-1.87 (1 H, m, C*H*CH3), 1.66 (3 H, s, CH3) and 0.99 (3 H, d, *J* 6.8, C*H*3CH); C(100 MHz, CDCl3) 146.0* (*C*=CH2), 137.2* (*i*-SPh), 128.8 and 128.7 (*o*- and *m*-SPh), 125.6 (*p*-SPh), 113.0* (*C*H2=C), 79.9 (CHOH), 36.6* (*C*SPh), 35.9 (*C*H2C=C), 17.4 (*C*HCH3) and 16.3 (*C*H3CH) (Found M+, 222.1086. C13H18OS requires M, 222.1078); *m/z* 222.1 (60%, M), 151.1 (70, C3H6SPh), 110.1 (100, PhSH) and 71.1 (50, C4H7O);[[2]](#footnote-3)† and the *ketone* **37** (13.8 mg, 15 %) as a colourless oil; *R*f [light petroleum (40-60 oC)-ether (9:1)] 0.6; *v*max(film, CDCl3)/cm-1 1700 (C=O); H(400 MHz, CDCl3) 7.39-7.15 (5 H, m, SPh), 3.23 (1 H, dd, *J* 12.9 and 7.3, C*H*AHBSPh), 2.95 (1 H, sextet, *J* 6.9, C*H*CH2), 2.85 (1 H, dd, *J* 12.9 and 6.3, CHA*H*BSPh), 2.68 (1 H, septet, *J* 6.8, C*H*(CH3)2), 1.19 (3 H, d, *J* 6.9, CH3), 1.07 (3 H, d, *J* 7.3, CH3) and 1.04 (3 H, d, *J* 7.1, CH3); C(100 MHz, CDCl3) 216.4* (C=O), 136.2* (*i*-SPh), 129.3 (*m*-SPh), 128.9 (*o*-SPh), 126.2 (*p*-SPh), 43.8 and 40.2 (2 × CH), 36.4* (CH2S), 18.2, 17.9 and 17.1 (3 × CH3) (Found M+, 222.1079. C13H18OS requires M, 222.1078); *m/z* 222.1 (100%, M), 151.1 (70, C3H6SPh), 110.0 (40, PhSH), 99.1 (10, C6H11O) and 71.1 (80, C3H7CO).

**(2*RS*,3*RS*)-2,4-Dimethyl-3-hydroxy-1-(phenylsulfanyl)-hexane (*E*)-*anti*-40**

In the same way as the sulfide **14**, the diol *anti*, *anti*-**38**9b(0.1 g, 0.39 mmol) and toluene-*p*-sulfonyl chloride (82 mg, 0.39 mmol) in pyridine (1 ml) gave, after flash column chromatography on silica gel eluting with light petroleum (40-60 oC)-ether (1:1) an inseparable regioisomeric mixture (80:20) of the (*E*)-*allylic alcohol* **40**A and *allylic alcohol* *anti*-**41**B (83 mg, 90 %) as a colourless oil; *R*f [light petroleum (40-60 oC)-ether (1:1)] 0.6; *v*max(film, CDCl3)/cm-1 3300 (OH); H(400 MHz, CDCl3) 7.37-7.12 (10 H, m, SPhA+B), 5.47 (1 H, qd, *J* 6.1 and 0.4, CH=CA), 5.12 (1 H, d, *J* 1.0, C*H*AHB=C), 4.92 (1 H, d, *J* 1.0, CHA*H*B=C), 3.95 (1 H, d, *J* 7.0, C*H*OHB), 3.81 (1 H, d, *J* 8.4, C*H*OHA), 3.39 (1 H, dd, *J* 12.8 and 3.4, C*H*AHBSPh), 3.33 (1 H, dd, *J* 12.8 and 3.2, C*H*AHBSPhA), 3.25 (1 H, dd, *J* 12.8 and 6.10, CHA*H*BSPhB), 2.74 (1 H, dd, *J* 12.8 and 8.8, CHA*H*BSPhA), 2.52 (1 H, sextet, *J* 6.8, C*H*CH3B), 2.02-1.95 (1 H, m, C*H*CH3A), 1.72-1.62 (2 H, m, CH2B), 1.61 (3 H, d, *J* 6.1, C*H*3CH=CA), 1.54 (3 H, s, CH3CA), 0.90 (3 H, d, *J* 6.8, C*H*3CHA), 0.86 (3 H, d, *J* 6.8, C*H*3CHB) and 0.84 (3 H, t, *J* 7.0, C*H*3CHA); C(100 MHz, CDCl3) 136.3* (*C*=CHA), 128.9* (*i*-SPhA), 128.7 (*m*-SPhA), 128.6 (*o*-SPhA), 125.5 (*p*-SPhA), 122.6 (*C*H=CA), 81.9 (CHOHA), 37.1* (CH2SA), 36.2 (*C*HCH3A), 16.3, 13.1 and 10.9 (3 × CH3A) (Found M+, 236.1234. C14H20OS requires M, 236.1234); *m/z* 236.1 (70%, M), 151.1 (60, C3H6SPh), 127.1 (10, M – SPh), 123.0 (40, CH2SPh), 110.0 (100, PhSH), 85.1 (70, M – C3H6SPh) and 77.1 (10, Ph). There was a NOE enhancement between the Me (H 1.61) and Me (H 1.54) for the allylic alcohol **40** signifying an (*E*)-configuration of double bond.

**5-(*tert*-Butyldiphenylsiloxy)pentan-2-one 43**

*tert*–Butyldiphenylsilylchloride (3.9 g, 3.75 ml, 14.7 mmol) and imidazole (1.96 g, 28.8 mmol) was added to a stirred solution of pentan-1,4-diol (1.5 g, 14.4 mmol) in DMF (15 ml). The solution was stirred for 12 h. Saturated NH4Cl (100 ml) was added and the solution was extraced with ether (3 × 100 ml). The combined organic layers were dried (MgSO4) and evaporated under reduced pressure. The residue was purified by flash column chromatography on silica gel eluting with light petroleum (40-60 oC)-ether (9:1) to give the 1-(*tert*-butyldiphenylsiloxy)-4-hydroxy-pentane (4.5 g, 92 %) as a colourless oil; *R*f [light petroleum (40-60 oC)-ether (1:1)] 0.5; *v*max(film, CDCl3)/cm-1 3200 (OH); H(400 MHz, CDCl3) 7.68 (2 H, m, *m*-Ph), 7.43 (3 H, m, *o*- and *p*-Ph), 3.84 (1 H, m, C*H*OH), 3.69 (2 H, t, *J* 5.7, CH2O), 2.20 (1 H, broad s, OH), 1.70-1.50 (4 H, m, 2 × CH2), 1.20 (3 H, d, *J* 6.1, CH3) and 1.05 (9 H, s, But) (Found (M – But)+, 285.1310. C17H21O2Si requires M, 285.1310); *m/z* 285.1 (20%, M), 199.1 (100, Ph2SiO) and (10, Ph).

Pyridinium dichromate (3.05 g, 8.77 mmol) was added to a solution of the above alcohol (2 g, 5.84 mmol) in CH2Cl2 (300 ml) at 0 oC. The solution was stirred for 4h. The solution was filtered through Celite®. The solvent was removed under reduced pressure. The residue was purified by flash column chromatography on silica gel eluting with light petroleum (40-60 oC)-ether (1:1) to give ketone **43** (1.5 g, 75 %) as a colourless oil; *R*f [light petroleum (40-60 oC)-ether (1:1)] 0.78; *v*max(film, CDCl3)/cm-1 1710 (C=O); H(250 MHz, CDCl3) 7.68-7.34 (10 H, m, 2 × CH2), 3.57 (2 H, t, *J* 6.0, CH2O), 2.54 (2 H, t, *J* 7.2, CH2C=O), 2.12 (3 H, s, CH3C=O), 1.88-1.77 (2 H, quintet, *J* 7.2, CH2) and 1.07 (9 H, s, But); *m/z* 199.1 (100, Ph2SiO) and (8, Ph).

**5-(*tert*-Butyldiphenylsilyloxy)-1-methoxy-phenylsulfanyl-2-methyl-pentan-2-ol 44**

n-BuLi (5.5 ml, 1.3 M in hexanes, 7.15 mmol) was added slowly to a stirred solution of (methoxymethyl phenyl sulfide **42** (1 g, 1 ml, 6.49 mmol) in THF (50 ml) at –78 oC. The solution was stirred for 1 h. A solution of aldehyde **43** (2.4 g, 7.14 mmol) in THF (20 ml) was slowly added. The solution was stirred for a further 1 h. Saturated NH4Cl (50 ml) was added and the solution was extracted with ether (3 × 100 ml). The combined organic layers were dried (MgSO4) and evaporated under reduced pressure. The residue was purified by flash column chromatography on silica gel eluting with light petroleum (40-60 oC)-ether (5:2) to give an inseparable diastereoisomeric mixture (50:50) of silyl ether **44** (3.19 g, 99 %) as an orange oil; *R*f  [light petroleum (40-60 oC)-ether (5:2)] 0.3; *v*max(film, CDCl3)/cm-1 3300 (OH and 1580 (SPh); H(200 MHz, CDCl3) 7.80-7.24 (15 H, m, 2 × Ph and PhS), 4.61 (1 H, s, C*H*SPh), 3.71 (2 H, t, *J* 7.3, CH2OCH3), 3.49 (3 H, s, OCH3), 2.58 (1 H, s, OH), 1.96-1.70 (4 H, m, 2 × CH2), 1.37 (3 H, s, CH3) and 1.21 (9 H, s, But) (Found (M – CH3OH – But)+, 405.1363. C24H25O2SSi requires M – CH3OH – But, 405.1344); *m/z* 405.1 (20%, M – CH3OH – But), 341.1 (15, M – PhSCHOCH3), 153.0 (25, PhSCHOCH3), 129.1 (100, C7H13O2), 110.0 (35, PhSH) and 77.0 (25, Ph).

**5-(*tert*-Butyldiphenylsilyloxy)-2-methyl-2-(phenylsulfanyl)-pentanal 45**

Thionyl chloride (2.32 g, 1.45 ml, 19.5 mmol) was slowly added to a stirred solution of alcohol **44** and Et3N (1.96 g, 2.65 ml, 19.5 mmol) in CH2Cl2 (300 ml) at 0 oC. The solution was stirred for 2 h. Saturated NH4Cl (100 ml) was added and the solution was extraced with ether (3 × 200 ml). The combined organic layers were dried (MgSO4) and evaporated under reduced pressure. The residue was purified by flash column chromatography on silica gel eluting with light petroleum (40-60 oC)-ether (5:2) the aldehyde **45** (1.89 g, 70 %) as an orange oil; *R*f [light petroleum (40-60 oC)-ether (5:2)] 0.85; *v*max(film, CDCl3)/cm-1 1750 (C=O) and 1550 (SPh); H(200 MHz, CDCl3) 9.32 (1 H, s, CHO), 7.69-7.21 (15 H, m, SPh and 2 × Ph), 3.65 (2 H, t, *J* 7.2, CH2O), 1.84-0.81 (4 H, m, 2 × CH2), 1.23 (3 H, s, CH3) and 1.05 (9 H, s, But); C(50 MHz, CDCl3) 195.2 (C=O), 137.0 (*p*-Ph), 135.5 (*m*-Ph), 135.0 (*i*-SPh), 133.7 (*i*-Ph), 129.6 (*o*-Ph), 128.9 (*p*-SPh), 127.6 (*o*-SPh), 63.5 (CH2O), 59.1 (*C*SPh), 30.4 (*C*CH3, But), 27.3 (CH2), 26.8 (*C*H3C, But), 19.2 (CH2) and 17.7 (CH3) (Found (M – But)+, 405.1321. C24H25O2SSi requires M – But, 405.1344); *m/z* 405.1 (100%, M – But), 295.1 (80, M – PhSH), 109.0 (10, PhS) and 77.0 (15, Ph).

**6-(*tert*-Butyldiphenyl)-3-methyl-3-(phenylsulfanyl)-hexan-2-ol 46**

MeMgBr (0.9 ml, 1.4 M in ether, 1.26 mmol) was slowly added to a stirred solution of aldehyde **45** (0.5 g, 1.2 mmol) in THF (10 ml) at –78 oC. The solution was stirred for 1 h. Saturated NH4Cl (10 ml) was added and the solution was extraced with ether (3 × 20 ml). The combined organic layers were dried (MgSO4) and evaporated under reduced pressure. The residue was purified by flash column chromatography on silica gel eluting with light petroleum (40-60 oC)-ether (1:1) to give an inseparable diastereomeric mixture (71:29) of the *anti*- and *syn*-*alcohol* **46** (0.31 g, 60 %) as a colourless oil; *R*f [light petroleum (40-60 oC)-ether (1:1)] 0.45; *v*max(film, CDCl3)/cm-1 3400-3200 (OH); H(200 MHz, CDCl3) 7.79-7.28 (30 H, m, SPhS, 2 × PhS, SPhA and 2  PhA), 3.78-3.48 (6 H, m, 2 × CH2O and 2 × CHO), 3.17 (1 H, broad s, OHS), 3.10 (1 H, broad s, OHA), 2.11-1.32 (8 H, m, 4 × CH2) and 1.25-1.10 (30 H, m, 2 × CH3A, 2 × CH3S, tBuA and tBuS) (Found (M – But)+, 433.2005. C27H33OSSi requires M – But, 433.2021); *m/z* 433.1 (20%, M – But), 311.1 (85, M – SPh – But), 199.1 (100, Ph2SiOH), 110.1 (50, PhSH), 77.1 (20, Ph) and 45.0 (10, But).

**(4*RS*,5*SR*)- and (4*SR*,5*SR*)-4-Methyl-4-(phenylsulfanyl)-hexan-1,5-diol *anti* and *syn-*47**

TBAF (3.15 ml, 1.1 M in THF, 3.47 mmol) was added to a stirred solution of *anti*- and *syn*-alcohol **46** (0.5 g, 1.15 mmol) in THF (10 ml). The solution was stirred for 1 hour. Saturated NH4Cl (1 ml) was added and the solution was extracted with ether (3  20 ml). The combined organic extracts were dried (MgSO4) and evaporated under reduced pressure. The residue was purified by flash column chromatography on silica gel eluting with ether to give a separable diastereoisomeric mixture (71:29: *anti*:*syn*) of the *anti*-*diol* **47** (0.14 g, 52 %) as a colourless oil; *R*f [ether] 0.3; *v*max(film, CDCl3)/cm-1 3500-3200 (OH); H(200 MHz, CDCl3) 7.49-7.28 (5 H, m, SPh), 3.68 (2 H, t, *J* 6.0, CH2O), 3.58 (1 H, q, *J* 6.3, C*H*CH3), 2.54-2.35 (2 H, m, 2 × OH), 1.99-1.64 (4 H, m, 2 × CH2), 1.15 (3 H, d, *J* 6.3, C*H*3CH) and 1.09 (3 H, s, CH3); C(100 MHz, CDCl3) 137.5 (*m*-SPh), 130.2* (*i*-SPh), 129.1 (*p*-SPh), 128.7 (*o*-SPh), 71.3 (CHOH), 63.2* (CH2O), 58.7* (*C*SPh), 30.3* and 27.6* (2 × CH2), 22.9 and 16.3 (2 × CH3) (Found M+, 240.1181. C13H20O2S requires M, 240.118); *m/z* 240.1 (40%, M), 196.1 (50, M — C2H4O) and 110.0 (100, PhSH); and the *syn*-diol **47** (60 mg, 22 %) as a colourless oil; *R*f [ether] 0.25; *v*max(film, CDCl3)/cm-1 3400-3250 (OH); H(200 MHz, CDCl3) 7.50-7.29 (5 H, m, SPh), 3.63 (2 H, t, *J* 6.40, CH2O), 3.51 (1 H, q, *J* 6.65, C*H*CH3), 2.45-1.88 (2 H, br s, 2 × OH), 2.12-1.27 (4 H, m, 2 × CH2), 1.15 (3 H, d, *J* 6.32, C*H*3CH) and 1.14 (3 H, s, CH3); C(100 MHz, CDCl3) 137.1 (*m*-SPh), 129.3 (*o*-SPh), 128.8 (*p*-SPh), 70.2 (CHOH), 62.9* (CH2O), 60.1* (*C*SPh), 32.4* and 27.5* (2 × CH2), 18.3 and 16.3 (2 × CH3) (Found M+, 240.1182. C13H20O2S requires M, 240.118); *m/z* 240.1 (40%, M), 196.1 (40, M – C2H4O) and 110.0 (100, PhSH).

**3-Methyl-6-(phenylsulfanyl)-hexan-2-one 50**

**a) TsCl rearrangement of *anti*-diol 47**

In the same way as sulfide **14**, the diol *anti*-**47** (0.11 g, 0.45 mmol) and toluene-*p*-sulfonyl chloride (0.95 mg, 0.49 mmol) in pyridine (2 ml) gave, after flash column chromatography on silica gel eluting with light petroleum (40-60 oC)-ether (9:1) the *ketone* **50** (97 mg, 96 %) as a colourless oil; *R*f [light petroleum (40-60 oC)-ether (9:1)] 0.1; *v*max(film, CDCl3)/cm-1 1725 (CO); H(400 MHz, CDCl3) 7.35-7.14 (5 H, m, SPh), 2.96-2.86 (2 H, m, CH2S), 2.53-2.44 (1 H, m, C*H*CH3), 2.09 (3 H, s, CH3), 1.93-1.23 (4 H, m, 2 × CH2) and 1.05 (3 H, d, *J* 7.0, C*H*3CH); C(100 MHz, CDCl3) 212.3* (CO), 136.1* (*i*-SPh), 128.9 (*m*-SPh), 128.8 (*o*-SPh), 125.9 (*m*-SPh), 46.7 (*C*HCH3), 33.6* (CH2S), 31.7* and 26.7* (2 × CH2), 28.0 (*C*H3CO) and 16.2 (*C*H3CH) (Found M+, 222.1069. C13H18OS requires M, 222.1078); *m/z* 222.1 (65%, M), 113.1 (100, M – SPh), 109.0 (45, PhS) and 77.0 (30, Ph).

**b) TsCl rearrangement of *syn*-diol 47**

In the same way as sulfide **14**, the diol *syn*-**47** (0.11 g, 0.45 mmol) and toluene-*p*-sulfonyl chloride (0.95 mg, 0.49 mmol) in pyridine (2 ml) gave, after flash column chromatography on silica gel eluting with light petroleum (40-60 oC)-ether (9:1) the *ketone* **50** (96 mg, 95 %) as a colourless oil; identical spectroscopically to that obtained previously.

**1-Trimethylsiloxypentene 52**

TMSCl (15.15 g, 17.7 ml, 0.139 mol) was added to a stirred solution of the pentanal(10 g, 12.34 ml, 0.116 mol) and Et3N (28.2 g, 37.9 ml, 0.27 mol) in DMF (55 ml). The solution was refluxed for 12 h. Water (100 ml) was added and the solution was extracted with light petroleum (200 ml, 30-40 oC). The organic layer was washed with HCl (3 M, 3 × 50 ml), saturated NaHCO3 (3 × 50 ml) and brine (3 × 50 ml) and evaportated under reduced pressure. The residue was purified by distillation (58-60 oC/38 mmHg) to give an inseparable stereoisomeric mixture (42:58, *trans*:*cis*) of the silyl enol ether **52** (14.56 g, 87 %) as a liquid; H(200 MHz, CDCl3) 6.19-6.14 (2 H, m, CHOTMSt and CHOTMSc), 4.96 (1 H, dt, *J* 12.4 and 7.4, C*H*CH2t), 4.48 (1 H, td, *J* 7.2 and 5.9, C*H*CH2c), 2.03 (1 H, qd, *J* 7.1 and 1.5, C*H*2CHc), 1.85 (1 H, qd, *J* 7.0 and 1.2, C*H*2CHt), 1.41-1.24 (4 H, m, CH2t and CH2c) and 0.94-0.83 (6 H, m, CH3t and CH3c); C(50 MHz, CDCl3) 139.3 (*C*HOTMSc), 137.7 (*C*HOTMSt), 111.7 (*C*HCH2t), 111.5 (*C*HCH2c), 29.4 (*C*H2CHt), 25.7 (*C*H2CHc), 23.5 (CH2t), 22.9 (CH2c), 13.6 and 13.4 (CH3t and CH3c), –0.1 (TMSt) and –0.1 (TMSc); *m/z* 158.1 (100%, M).

**2-Phenylsulfanyl pentanal 53**

Sulfuryl chloride (1.4 g, 0.87 ml, 10.4 mmol) was slowly added to a stirred solution of phenyl disulfide (2.27 g, 10.4 mmol) and pyridine (4 drops by pipette) in CH2Cl2 (50 ml) at 0 oC. The solution was stirred for 1 h. Silyl enol ether **52** (3 g, 20.8 mol) was slowly added and the solution was stirred for a further 1 hour. Saturated NH4Cl (1 ml) was added and the solution was extracted with ether (3  100 ml). The combined organic extracts were dried (MgSO4) and evaporated under reduced pressure. The residue was purified by flash column chromatography on silica gel eluting with light petroleum (40-60 oC)-ether (1:1) to give the *aldehyde* **53** (3.26 g, 81 %) as an orange oil; *R*f [light petroleum (40-60 oC)-ether (9:1)] 0.5; *v*max(film, CDCl3)/cm-1 1750 (SPh), 1600 and 1550 (SPh); H(200 MHz, CDCl3) 9.38 (1 H, d, *J* 4.2, CHO), 7.43-7.25 (5 H, m, SPh), 3.51 (1 H, td, *J* 6.8 and 4.2, C*H*SCH2), 1.91-1.43 (4 H, m, 2 × CH2) and 0.96 (3 H, t, *J* 7.1, CH3); C(50 MHz, CDCl3) 194.3 (CHO), 132.8 (*m*-SPh), 131.0 (*i*-SPh), 129.2 (*o*-SPh), 128.1 (*p*-SPh), 56.6 (*C*HSPh), 29.0 (CH2), 20.2 (CH2) and 13.7 (CH3); *m/z* 165.1 (5%, M – CHO), 109.0 (100, PhS) and 77.1 (20, Ph).

***anti*-(3*RS*,4*SR*) and *syn*-, *anti*-(3*RS*,4*RS*) Ethyl 3-hydroxy-4-(phenylsulfanyl)heptanoate 57**

n-BuLi (10.9 ml, 1.3 M in hexanes, 14.1 mmol) was added to diisopropylamine (1.82 g, 2.45 ml, 18 mmol) in THF (250 ml) at –78 oC. The solution was stirred for 30 mins. Ethyl acetate (1.18 g, 1.32 ml, 14.1 mmol) in THF (10 ml) was added slowly to this solution. The solution was stirred for 30 mins. The aldehyde and aldehyde **53** (2.5 g, 12.8 mmol) in THF (50 ml) was added slowly. The solution was stirred for a further 30 mins. Saturated NH4Cl (100 ml) was added and the solution was allowed to warm to room temperature. The solution was extracted with ether (3  300 ml). The combined organic layers were dried (MgSO4) and evaporated under reduced pressure. The residue was purified by HPLC eluting with light petroleum (40-60 oC)-ether (9:1) to give the *anti*-*ester* **57**(1.72 g, 33 %) as a colourless oil; *R*f [light petroleum (40-60 oC)-ether (9:1)] 0.12; *v*max(film, CDCl3)/cm-1 3300 (OH) and 1700 (CO); H(200 MHz, CDCl3) 7.41-7.18 (5 H, m, SPh), 4.15-4.02 (1 H, m, C*H*OH), 4.10 (2 H, q, *J* 7.0, CH2O), 3.18 (1 H, td, *J* 8.9 and 4.8, C*H*SPh), 3.09 (1 H, d, *J* 5.0, OH), 2.69-2.52 (2 H, m, CH2CO2), 1.81-1.45 (4 H, m, 2 × CH2), 1.23 (3 H, t, *J* 7.1, C*H*3CH2O) and 0.94 (3 H, t, *J* 6.8, C*H*3CH2); C(50 MHz, CDCl3) 172.3 (CO), 135.1 (*i*-SPh), 131.6 (*m*-SPh), 128.9 (*o*-SPh), 126.9 (*p*-SPh), 69.9 (CHOH), 60.7 (CH2O), 55.1 (CHS), 38.3 (*C*H2CO2), 32.3 (CH2), 20.4 (CH2), 14.0 (*C*H3CH2O) and 13.8 (*C*H3CH2) (Found M+, 282.1290. C15H22O3S requires M, 282.1289); *m/z* 282.1 (80%, M), 264.1 (40, M – H2O), 173.1 (5, M – SPh), 165.1 (50, C4H8SPh), 123.0 (100, CH2SPh), 117.1 (40, M – C4H8SPh) and 110.0 (50, PhSH); and the *syn*-*ester* **57** (0.57 g, 11.2 %) as a colourless oil; *R*f [light petroleum (40-60 oC)-ether (9:1)] 0.1; *v*max(film, CDCl3)/cm-1 3300 (OH), 1700 (CO) and 1550 (SPh); H(200 MHz, CDCl3) 7.45-7.19 (5 H, m, SPh), 4.20-4.03 (1 H, m, C*H*OH), 4.10 (2 H, q, *J* 7.0, CH2O), 3.29 (1 H, d, *J* 4.0, OH), 3.21-3.11 (1 H, m, C*H*SPh), 2.77-2.53 (2 H, double AB quartet, CH2CO2), 1.86-1.35 (4 H, m, 2 × CH2), 1.22 (3 H, t, *J* 7.0, C*H*3CH2O) and 0.92 (3 H, t, *J* 6.7, C*H*3CH2); C(50 MHz, CDCl3) 172.5 (CO), 135.0 (*i*-SPh), 131.3 (*m*-SPh), 128.6 (*o*-SPh), 126.7 (*p*-SPh), 69.7 (CHOH), 60.5 (CH2O), 54.6 (*C*HSPh), 38.0 (*C*H2CO2), 32.7 (CH2), 20.5 (CH2), 13.9 (*C*H3CH2O) and 13.7 (*C*H3CH2) (Found M+, 282.1290. C15H22O3S requires M, 282.1289); *m/z* 282.1 (25%, M), 165.0 (50, C4H8SPh), 123.0 (100, CH2SPh) and 110.0 (60, PhSH).

***anti*-, *anti*-(2*SR*,3*RS*,4*SR*) and *syn*-, *anti*-(2*SR*,3*RS*,4*RS*)-2,6-Dimethylphenyl 4-phenylsulfanyl-3-hydroxy-2-methyl-heptanoate 58**

In the same way as the ester **57**, diisopropylamine (1.05 g, 1.42 ml, 10.5 mmol), n-BuLi (6.33 ml, 1.3 M in hexanes, 8.23 mmol), Heathcock's ester17 (1.4 g, 7.86 mmol) and aldehyde **53** (1.45 g, 7.86 mmol) in THF (150 ml) gave, after HPLC with light petroleum (40-60 oC)-ether (9:1) an inseparable diastereoisomeric mixture (67:33) of the *anti*, *anti*-ester **58**A and the *syn, anti-ester* **58** B(2.47 g, 89 %) as a colourless oil; *R*f [light petroleum (40-60 oC)-ether (9:1)] 0.5; *v*max(film, CDCl3)/cm-1 3300 (OH); H(200 MHz, CDCl3) 7.26-6.95 (10 H, m, SPhA and SPhB), 6.81-6.75 (6 H, br s, OArA and OArB), 3.70-3.60 (1 H, m, C*H*OHB), 3.65-3.57 (1 H, m, C*H*OHA), 3.33-2.90 (4 H, m, C*H*SPhA, C*H*CH3A, C*H*SPhB and C*H*CH3B), 2.75 (1 H, d, *J* 5.0, OHA), 2.56 (1 H, d, *J* 4.3, OHB), 1.88 (6 H, br s, 2 × CH3, ArA and 2 × CH3, ArB), 1.65-0.90 (8 H, m, 2 × CH2A and 2 × CH2B), 1.15 (3 H, d, *J* 6.6, C*H*3CHB) and 1.11 (3 H, d, *J* 7.4, C*H*3CHB); C(50 MHz, CDCl3) 182.0 (COB), 173.3 (COA), 147.8 (*i*-OArB and *i*-OArA), 132.7, 132.3, 131.9, 131.4, 130.5, 130.1, 129.9, 129.1, 128.6, 128.5, 128.0, 127.2, 125.8 and 125.7 (SPhA, SPhB, OArA and OArB), 72.5 (CHOHA), 70.8 (CHOHB), 53.0 (*C*HSPhA), 52.3 (*C*HSPhB), 42.2 (*C*HCH3A), 41.8 (*C*HCH3B), 30.8 (CH2B), 30.0 (CH2A), 20. 5(CH2A), 20.1 (CH2s), 16.3 (2 × CH3, ArA), 15.8 (2  CH3, ArB), 13.9 (*C*H3CHA), 13.9 (*C*H3CHB), 13.1 (CH3A) and 13.0 (CH3B); *m/z* 372.1 (80%, M), 263.1 (1, M – SPh), 251.1 (100, M – OAr), 122.1 (80, ArOH), 109.0 (30, SPh) and 77.0 (Ph).

**(3*RS*,4*SR*)-Ethyl 4-phenylsulfanyl-3-hydroxy-2,2-dimethyl heptanoate *anti*-59**

In the same way as the ester **57**, diisopropylamine (1.29 g, 1.74 ml, 12.8 mmol), n-BuLi (7.76 ml, 1.3 M in hexanes, 10.1 mmol), ethyl isobutyrate (1.12 g, 1.28 ml, 9.63 mmol) and aldehyde **53** (1.78 g, 9.17 mmol) in THF (150 ml) gave, after flash column chromatography on silica gel eluting with light petroleum (40-60 oC)-ether (9:1) the *anti*-*ester* **59**(2.47 g, 87 %) as a colourless oil; *R*f [light petroleum (40-60 oC)-ether (9:1)] 0.1; *v*max(film, CDCl3)/cm-1 3300 (OH) and 1700 (CO); H(200 MHz, CDCl3) 7.46-7.22 (5 H, m, SPh), 4.11 (1 H, q, *J* 7.1, C*H*AHBO), 4.09 (1 H, q, *J* 7.1, CHA*H*BO), 3.86 (1 H, dd, *J* 6.7 and 2.5, C*H*OH), 3.23 (1 H, dt, *J* 8.8 and 3.0, C*H*SPh), 3.03 (1 H, d, *J* 6.7, OH), 1.71-1.39 (4 H, m, 2 × CH2), 1.22 (3 H, t, *J* 7.0, C*H*3CH2O), 1.18 (3 H, s, CH3), 1.14 (3 H, s, CH3) and 0.90 (3 H, t, *J* 6.7, C*H*3CH2); C(50 MHz, CDCl3) 178.0 (CO), 135.6 (*i*-SPh), 132.2 (*m*-SPh), 128.8 (*o*-SPh), 127.0 (*p*-SPh), 78.9 (CHOH), 60.8 (CH2O), 52.8 (*C*HSPh), 46.1 (*C*CH3), 23.1 (CH2), 22.5 (CH2), 20.8 (*C*H3CH2O) and 13.9 (*C*H3CH2) (Found M+, 310.1608. C17H26O3S requires M, 310.1602); *m/z* 310.2 (20%, M).

**(3*RS*,4*SR*)-4-Phenylsulfanyl-heptan-1,3-diol *anti*-60**

LiAlH4 (99 mg, 2.65 mmol) was added to a stirred solution of the ester *anti*-**57** (0.25 g, 0.88 mmol) in THF (10 ml) at 0 oC. The solution was stirred for 2 hours and poured onto ice/brine. NaOH (2 ml, 10 %) was added and the solution was extracted with ether (3 20 ml). The combined organic extracts were dried (MgSO4) and evaporated under reduced pressure. The residue was purified by flash chromatography on silica gel eluting with ether to give the *diol* *anti*-**60**(0.18 g, 84 %) as a colourless oil; *R*f [ether] 0.45; *v*max(film, CDCl3)/cm-1 3500-3300 (OH); H(200 MHz, CDCl3) 7.42-7.18 (5 H , m, SPh), 3.87 (1 H, ddd, *J* 13.2, 8.1 and 3.9, C*H*OH), 3.75 (2 H, br t, *J* 5.1, CH2O), 3.22 (1 H, br d, *J* 4.7, OH), 3.18-3.12 (1 H, m, C*H*SPh), 3.10-3.00 (1 H, br s, CH2O*H*), 1.82-1.47 (6 H, m, 3 × CH2) and 0.91 (3 H, t, *J* 6.7, CH3); C(50 MHz, CDCl3) 135.1 (*i*-SPh), 131.6 (*m*-SPh), 128.9 (*o*-SPh), 126.9 (*p*-SPh), 72.1 (CHOH), 61.1 (CH2O), 56.6 (*C*HSPh), 34.9, 31.9 and 20.6 (3 × CH2) and 13.8 (CH3) (Found M+, 240.1191. C13H20O2S requires M, 240.1183); *m/z* 240.1 (50%, M), 165.1 (70, C4H8SPh), 123.0 (100, CH2SPh), 110.0 (80, PhSH) and 77.0 (10, Ph).

**(3*RS*,4*RS*)-4-Phenylsulfanyl-heptan-1,3-diol *syn*-60**

In the same way as diol **60**, the ester *syn*-**57** (0.25 g, 0.88 mmol) and LiAlH4 (99 mg, 2.65 mmol) in ether (50 ml) gave, after flash column chromatography on silica gel eluting with ether the *diol* *syn*-**60**(0.19 g, 90 %) as a colourless oil; *R*f [ether] 0.44; *v*max(film, CDCl3)/cm-1 3500-3300 (OH); H(200 MHz, CDCl3) 7.45-7.21 (5 H, m, SPh), 3.94-3.70 (3 H, m, CH2O and C*H*OH), 3.48 (1 H, d, *J* 4.7, OH), 3.21-2.99 (2 H, m, C*H*SPh and OH), 1.92-1.28 (6 H, m, 3 × CH2) and 0.92 (3 H, t, *J* 7.2, CH3); C(50 MHz, CDCl3) 134.6 (*i*-SPh), 131.9 (*m*-SPh), 128.8 (*o*-SPh), 126.9 (*p*-SPh), 72.9 (CHOH), 61.3 (CH2O), 56.8 (*C*HSPh), 35.0, 32.8 and 20.4 (3 × CH2) and 13.7 (CH3) (Found M+, 240.1183. C13H20O2S requires M, 240.1183); *m/z* 240.1 (40%, M), 165.1 (60, C4H8SPh), 123.2 (100, CH2SPh), 110.0 (70, PhSH) and 77.0 (15, Ph).

**TsCl rearrangement of diol *anti*-60**

In the same way as the allylic alcohol **14**, the diol *anti*-**60** (73 mg, 0.30 mmol) and toluene-*p*-sulfonyl chloride (63 mg, 0.30 mmol) in pyridine (1 ml) gave, after flash column chromatography on silica gel eluting with light petroleum (40-60 oC)-ether (1:1) an inseparable mixture (76:24) of the *unrearranged chloride* *anti*-**64**U and *rearranged chloride* *syn*-**65**R(66 mg, 84 %) as a colourless oil; *R*f [light petroleum (40-60 oC)-ether (1:1)] 0.7; *v*max(film, CDCl3)/cm-1 3300 (OH); H(400 MHz, CDCl3) 7.45-7.20 (10 H, m, SPhU and SPhR), 3.92 (1 H, dt, *J* 10.0 and 3.0, C*H*OHU), 3.89-3.82 (3 H, m, CHOHR, CHClR and OH), 3.72-3.63 (2 H, m, CH2ClU), 3.21 (1 H, dt, *J* 9.2 and 3.8, C*H*SPhU), 3.17-3.00 (2 H, m, C*H*2SPhR), 2.01-1.32 (13 H, m, 3 × CH2R, 3 × CH2U and OH), 0.92 (3 H, t, *J* 6.9, CH3U) and 0.91 (3 H, t, *J* 7.0, CH3R); C(100 MHz, CDCl3) 136.0* (*i*-SPhR), 134.9* (*i*-SPhR), 131.8 (*m*-SPhU), 129.8 (*m*-SPhR), 129.1 (*o*-SPhU), 129.0 (*o*-SPhR), 127.2 (*p*-SPhU), 126.1 (*p*-SPhR), 72.5 (CHOR), 69.4 (CHOU), 68.6 (CHClR), 57.0 (*C*SPhU), 42.1* (CH2ClU), 36.7* (*C*H2SPhR), 36.0* (CH2U), 33.9* (CH2R), 32.2* (CH2U), 30.0* (CH2R), 20.8* (CH2U), 19.7* (CH2R), 13.9 (CH3U) and 13.5 (CH3R) (Found M+, 258.0846. C13H19ClOS requires M, 258.0845); *m/z* 260.1 (5, M (37Cl)), 258.1 (20%, M(35Cl)), 222.1 (40, M – HCl), 165.1 (5, C4H8SPh), 123.0 (100, CH2SPh), 109.0 (20, SPh) and 77.0 (5, Ph).

**TsCl rearrangement of diol *syn*-60**

In the same way as allylic alcohol **14**, the diol *syn*-**60** (70 mg, 0.29 mmol) and toluene-*p*-sulfonyl chloride (60 mg, 0.29 mmol) in pyridine (1 ml) gave, after flash column chromatography on silica gel eluting with light petroleum (40-60 oC)-ether (1:1) an inseparable mixture (86:14) of *unrearranged chloride* *syn*-**64**U and *rearranged chloride* *anti*-**65**R(68 mg, 90 %) as a colourless oil; *R*f [light petroleum (40-60 oC)-ether (1:1)] 0.66; *v*max(film, CDCl3)/cm-1 3300 (OH) and 1550 (SPh); C(400 MHz, CDCl3) 7.43-7.21 (10 H, m, SPhU and SPhR), 3.94-3.81 (3 H, m, C*H*OHR, OH and CHClR), 3.80 (1 H, ddd, *J* 5.8, 5.7 and 2.9, C*H*OHU), 3.74-3.63 (2 H, m, CH2ClU), 3.23-3.09 (2 H, m, CH2SPhR), 3.05-2.96 (1 H, m, C*H*SPh), 2.65-2.35 (1 H, br s, OH), 2.04-1.43 (6 H, m, 3 × CH2U and 3 × CH2R), 0.92 (3 H, t, *J* 6.7, CH3U) and 0.87 (3 H, t, *J* 6.8, CH3R); C(100 MHz, CDCl3) 134.5* (*i*-SPhU), 132.4 (*m*-SPhU), 131.8 (*m*-SPhR), 129.2 (*o*-SPhR), 129.1 (*o*-SPhU), 127.4 (*m*-SPhU), 127.3 (*m*-SPhR), 70.2 (CHOHU), 69.4 (CHOHR), 57.4 (*C*HSPhU), 57.0 (CHClR), 42.1* (CH2ClU), 37.0* (CH2U), 36.7* (CH2SPhR), 36.0* (CH2R), 33.5* (CH2U), 32.2* (CH2R), 20.8* (CH2R), 20.5* (CH2U), 13.9 (CH3U) and 13.5 (CH3R); *m/z* 260.1 (5, M (37Cl)), 258.1 (20%, M(35Cl)), 222.1 (50, M – HCl), 123.0 (100, CH2SPh) and 109.0 (20, SPh).

***anti*-, *anti*-(2*SR*,3*RS*,4*SR*) and *syn-*, *syn*-(2*SR*,3*SR*,4*RS*)-4-Phenylsulfanyl-2-methyl heptan-1,3-diol 61**

In the same way as the diol **60**, the ester **58** (1.0 g, 2.68 mmol) and LiAlH4 (0.3 g, 8.06 mmol) in ether (100 ml) gave, after HPLC eluting with ether the *syn*, *anti*-*diol* **61** (0.20 g, 30.3 %) as a colourless oil; *R*f [ether] 0.55; *v*max(film, CDCl3)/cm-1 3500-3300 (OH); H(200 MHz, CDCl3) 7.45-7.21 (5 H, m, SPh), 3.80-3.70 (1 H, m, C*H*OH), 3.70-3.61 (2 H, m, CH2O), 3.25 (1 H, dt, *J* 8.8 and 3.1, C*H*SPh), 3.01-2.85 (1 H, br s, OH), 2.39-2.11 (2 H, m, OH and C*H*CH3), 1.88-1.43 (4 H, m, 2 × CH2), 0.93 (3 H, t, *J* 6.7, C*H*3CH2) and 0.88 (3 H, d, *J* 6.9, C*H*3CH); C(50 MHz, CDCl3) 135.8 (*i*-SPh), 131.9 (*m*-SPh), 128.9 (*o*-SPh), 126.9 (*p*-SPh), 74.8 (CHOH), 66.9 (CH2O), 53.6 (*C*HSPh), 36.6 (*C*HCH3), 32.0 (CH2), 20.2 (CH2), 14.0 (*C*H3CH2O) and 10.9 (*C*H3CH) (Found M+, 254.1339. C14H22O2S requires M, 252.1360); *m/z* 254.1 (80%, M), 166.1 (100, C4H8SPh + H), 123.0 (60, PhSCH+ H) and 109.0 (20, SPh); and the *anti*, *anti-diol* **61**(0.41 g, 61 %) as a colourless oil; *R*f [ether] 0.5; *v*max(film, CDCl3)/cm-1 3500-300 (OH); H(200 MHz, CDCl3) 7.45-7.20 (5 H, m, SPh), 3.61-3.36 (5 H, m, CH2OH and CHOH), 3.31-3.24 (1 H, dt, *J* 9.8 and 2.5, C*H*SPh), 2.01-1.40 (4 H, m, 2 × CH2), 0.95 (3 H, t, *J* 6.5, C*H*3CH2) and 0.74 (3 H, d, *J* 6.9, C*H*3CH); C(50 MHz, CDCl3) 134.2 (*i*-SPh), 131.8 (*m*-SPh), 129.0 (*o*-SPh), 127.1 (*p*-SPh), 77.0 (CHOH), 66.0 (CH2O), 53.6 (*C*HSPh), 36.5 (*C*HCH3), 28.9 (CH2), 20.7 (CH2), 13.8 (*C*H3CH2O) and 13.1 (*C*H3CH2) (Found M+, 254.1339. C14H22O2S requires M, 252.1360); *m/z* 254.1 (100%, M), 166.1 (90, C4H8SPh + H), 123.0 (20, PhSCH+ H) and 109.0 (30, SPh).

**TsCl rearrangement of diol *anti*, *anti*-61**

In the same way as the sulfide **14**, the diol *anti*, *anti*-**61** (0.1 g, 0.37 mmol) and toluene-*p*-sulfonyl chloride (77.6 mg, 0.37 mmol) in pyridine (1 ml) gave, after flash column chromatography on silica gel eluting with light petroleum (40-60 oC)-ether (9:1) an inseparable regioisomeric mixture (83:17) of *rearranged chloride* *syn*-**68**R and *unrearranged* *chloride* *anti*, *anti*-**67**U (0.1 g, 95 %) as a colourless oil; *R*f [light petroleum (40-60 oC)-ether (9:1)] 0.2; *v*max(film, CDCl3)/cm-1 3300 (OH); H(400 MHz, CDCl3) 7.39-7.13 (10 H, m, SPhU and SPhR), 4.15-4.09 (1 H, m, C*H*OHR), 3.75 (1 H, double AB quartet, *J* 10.90 and 3.27, C*H*AHBClU), 3.63 (1 H, double AB quartet, *J* 10.6 and 6.2, CHA*H*BClU), 3.43 (1 H, td, *J* 8.8 and 2.6, CHClR), 3.36 (1 H, dd, *J* 12.8 and 3.6, C*H*AHBSPhR), 3.28 (1 H, td, *J* 10.4 and 2.7, C*H*SPhU), 2.85 (1 H, dd, *J* 12.8 and 8.1, CHA*H*BSPh), 2.09-2.00 (2 H, m, C*H*CH3R and C*H*CH3U), 1.94 (1 H, d, *J* 9.2, OHR), 1.89-1.66 (4 H, m, 2 × CH2), 1.60 (1 H, br s, OHU), 1.58-1.36 (4 H, m, 2 × CH2), 1.06 (3 H, d, *J* 6.7, C*H*3CHR), 0.96 (3 H, t, *J* 7.1, *C*H3CH2U), 0.91 (3 H, t, *J* 7.3, *C*H3CH2R) and 0.88 (3 H, d, *J* 6.87, C*H*3CHU); C(100 MHz, CDCl3) 136.8* (*i*-SPhr), 132.0* (*i*-SPhU), 131.9 (*m*-SPhU), 129.1 (*o*-SPhU), 129.0 (*m*-SPhR), 128.8 (*o*-SPhU), 127.3 (*p*-SPhU), 125.8 (*p*-SPhR), 76.8 (CHOHR), 72.4 (CHOHU), 66.0* (CH2ClR), 53.5 (*C*HSPhU), 49.3* (CH2ClU), 37.4* (*C*H2SPhR), 37.4 (*C*HCH3R), 37.3* (CH2R), 37.0 (*C*HCH3U), 28.6* (CH2U), 20.8* (CH2U), 19.9* (CH2R), 15.9 (*C*H3CHR), 13.8 (*C*H3CHU), 13.7 (*C*H3CH2U) and 13.5 (*C*H3CH2R); *m/z* 274.1 (2%, M (37Cl)), 272.1 (10, M (35Cl)), 236.1 (100, M – HCl), 165.1 (50, C4H8SPh) and 109.0 (5, SPh).

**TsCl rearrangement of diol *syn*, *anti*-61**

In the same way as the sulfide **14**, the diol *syn*, *anti*-**61** (68 mg, 0.26 mmol) and toluene-*p*-sulfonyl chloride (55 mg, 0.26 mmol) in pyridine (1 ml) gave, after flash column chromatography on silica gel eluting with light petroleum (40-60 oC)-ether (9:1) an inseparable regioisomeric mixture (81:19) of *unrearranged* *chloride* *syn*, *anti*-**67**U and *rearranged chloride* *anti*, *anti*-**68**R (65 mg, 90 %) as a colourless oil; *R*f [light petroleum (40-60 oC)-ether (9:1)] 0.2; *v*max(film, CDCl3)/cm-1 3300 (OH); H(400 MHz, CDCl3) 7.43-7.15 (10 H, m, SPhU and SPhR), 4.04 (1 H, q, *J* 6.5, C*H*OHR), 3.78 (1 H, d, *J* 6.5, OH), 3.76-3.72 (1 H, m, CHClR), 3.70 (1 H, br t, C*H*OH), 3.54 (1 H, double AB quartet, *J* 10.9 and 5.8, C*H*AHBClU), 3.46 (1 H, double AB quartet, *J* 10.9 and 5.0, CHA*H*BClU), 3.27 (1 H, m, C*H*SPhU), 3.10 (1 H, dd, *J* 13.0 and 6.7, C*H*AHBSPhR), 2.91 (1 H, dd, *J* 13.0 and 6.4, CHA*H*BSPh), 2.31-2.23 (2 H, m, C*H*CH3U and OH), 1.98-1.93 (1 H, m, C*H*CH3R), 1.78-1.38 (8 H, m, 2 × CH2U and 2 × CH2R), 1.20 (3 H, t, *J* 6.9, C*H*3CH2R), 1.05 (3 H, d, *J* 6.7, C*H*3CHR), 1.02 (3 H, d, *J* 6.7, C*H*3CHU) and 0.93 (3 H, t, *J* 6.9, C*H*3CH2U); C(100 MHz, CDCl3) 134.7* (*i*-SPhU), 133.0* (*i*-SPhR), 132.1 (*m*-SPhU), 129.2 (*m*-SPhR), 129.0 (*o*-SPhU), 128.9 (*o*-SPhR), 127.2 (*p*-SPhU), 126.0 (*p*-SPhR), 75.3 (CHOHR), 72.7 (CHOHU), 68.0 (CHClR), 53.5 (*C*HSPhU), 48.2* (CH2ClU), 38.1* (*C*H2SPhR), 37.1 (*C*HCH3U), 36.1* (CH2R), 35.3 (*C*HCH3R), 31.2* (CH2U), 20.4* (CH2U), 19.2* (CH2R), 18.5 (*C*H3CHR), 13.9 (*C*H3CHU), 13.4 (*C*H3CH2U) and 13.3 (*C*H3CH2R).

**(3*RS*,4*SR*)-4-Phenylsulfanyl-2,2-dimethyl-heptan-1,3-diol *anti*-62**

In the same way as the diol **60**, the ester *anti*-**59** (0.7 g, 2.25 mmol) and LiAlH4 (0.25 g, 6.77 mmol) in ether (100 ml) gave, after flash column chromatography on silica gel eluting with ether the *diol* *anti*-**62**(0.51 g, 84 %) as a colourless oil; *R*f [ether] 0.7; *v*max(film, CDCl3)/cm-1 3400-3300 (OH); H(200 MHz, CDCl3) 7.45-7.21 (5 H, m, SPh), 3.67 (1 H, dd, *J* 3.2 and 1.4, C*H*OH), 3.43-3.27 (3 H, m, CH2OH), 2.90 (1 H, dd, *J* 6.5 and 4.8, C*H*SPh), 2.83 (1 H, d, *J* 3.2, OH), 1.92-1.75 (2 H, m, CH2), 1.59-1.40 (2 H, m, CH2), 0.97 (3 H, t, *J* 6.9, C*H*3CH2), 0.93 (3 H, s, CH3) and 0.78 (3 H, s, CH3); C(50 MHz, CDCl3) 134.5 (*i*-SPh), 131.2 (*m*-SPh), 129.6 (*o*-SPh), 128.3 (*p*-SPh), 80.2 (CHOH), 73.5 (CH2O), 52.3 (*C*HSPh), 39.7 (*C*CH3), 30.8 (CH3), 23.5 (CH2), 22.3 (CH2), 20.8 (CH3) and 14.5 (*C*H3CH2) (Found M+, 268.1484. C15H24O2S requires M, 268.1496); *m/z* 268.1 (70%, M), 166.1 (100, C4H8SPh + H), 123.0 (50, PhSCH + H) and 109.0 (10, SPh).

**TsCl rearrangement of diol *anti*-62**

In the same way as the sulfide **14**, the diol *anti*-**62** (0.1 g, 0.37 mmol) and toluene-*p*-sulfonyl chloride (77.6 mg, 0.37 mmol) in pyridine (1 ml) gave, after flash column chromatography on silica gel eluting with light petroleum (40-60 oC)-ether (9:1) an inseparable regioisomeric mixture (80:20) of the *rearranged* *chloride anti-***72**R and the *unrearranged chloride* *anti*-**71**U (0.1 g, 95 %) as a colourless oil; *R*f [light petroleum (40-60 oC)-ether (9:1)] 0.3; *v*max(film, CDCl3)/cm-1 3300 (OH); H(400 MHz, CDCl3) 7.43-7.15 (10 H, m, PhR and PhU), 4.22 (1 H, dd, *J* 8.8 and 3.8, C*H*OHR), 4.01-3.95 (1 H, m, C*H*OHU), 3.77 (1 H, d, *J* 6.5, OH), 3.64 (1 H, d, *J* 9.9, CHClR), 3.54 (1 H, AB quartet, *J* 10.6, C*H*AHBClU), 3.27 (1 H, AB quartet, *J* 10.6, CHA*H*BClU), 3.14 (1 H, AB quartet, *J* 12.4, C*H*AHBSPhR), 2.97 (1 H, AB quartet, *J* 12.4, CHA*H*BSPhR), 2.20 (1 H, br d, *J* 10.5, C*H*SPhU), 1.95-1.30 (8 H, m, 2 × CH2R and 2 × CH2U), 1.24 (3 H, s, CH3U), 1.10 (3 H, s, CH3R), 1.06 (3 H, s, CH3R), 0.98 (3 H, s, CH3U), 0.91 (3 H, t, *J* 7.2, C*H*3CH2R) and 0.89 (3 H, t, *J* 7.1, C*H*3CH2U); C(100 MHz, CDCl3) 137.6* (*i*-SPhR), 134.9* (*i*-SPhU), 132.8 (*m*-SPhU), 129.8 (*p*-SPhU), 129.3 (*m*-SPhR), 129.0 (*o*-SPhU), 128.9 (*o*-SPhR), 125.9 (*p*-SPhR), 77.0 (CHOHR), 75.7 (CHOHU), 63.8 (CHClR), 54.4* (CH2ClU), 53.1 (*C*HSPh), 45.3* (*C*H2SPhR), 40.1* (*C*CH3R), 39.8* (CH2R), 31.1* (CH2U), 29.7* (CH2U), 23.9 (CH3R), 23.6 (CH3R), 22.9 (CH3U), 21.3 (CH3U), 19.9* (CH2R), 14.0 (*C*H3CH2U) and 13.4 (*C*H3CH2R); *m/z* 268.1 (5%, M – H2O), 251.1 (5, M – 35Cl), 249.1 (2, M – 37Cl) and 195.0 (60, M – C4H8Cl).

**(2*RS*, 3*SR*)-2-Methyl-3-[(1'-*S*-phenylsulfonyl)dimethyl]-pentan-1,3-diol *anti*-74**

*m-*CPBA (0.26 g, 1.66 mmol) was slowly added to a solution of diol *anti*-**34** (0.2 g, 0.83 mmol) and Na2HPO4 (0.35 g, 2.5 mmol) in CH2Cl2 (5 ml) at 0 oC. The solution was stirred for 2 hours. Saturated NH4Cl (20 ml) was added and the solution was extracted with ether (3  50 ml). The combined organic layers were dried (MgSO4) and evaporated under reduced pressure. The residue was purified by flash column chromatography on silica gel eluting with ether to give the *sulfone* *anti*-**74**(0.18 g, 86 %) as a colourless oil; *R*f [ether] 0.3; *v*max(film, CDCl3)/cm-1 3400-3200 (OH); H(400 MHz, CDCl3) 7.87 (2 H, dd, *J* 5.2 and 0.8, *o*-SPh), 7.69 (1 H, t, *J* 7.5, *p*-SPh), 7.59 (1 H, t, *J* 7.4, *m*-SPh), 4.19 (1 H, br s, OH), 4.11 (1 H, d, *J* 4.8, C*H*OH), 3.66 (2 H, m, CH2O), 2.95 (1 H, br s, OH), 1.92 (1 H, m, C*H*CH3), 1.44 (3 H, s, CH3), 1.23 (3 H, s, CH3) and 1.00 (3 H, d, *J* 7.0, C*H*3CH); C(100 MHz, CDCl3) 134.6* (*i*-SPh), 134.1 (*p*-SPh), 130.4 (*o*-SPh), 129.0 (*m*-SPh), 76.6 (CHOH), 67.4* (*C*SPh), 65.7* (CH2O), 36.0 (*C*HCH3), 20.1, 17.9 and 15.6 (3 × CH3) (Found (M + H)+, 273.1142. C13H21O4S requires M + H, 273.1142); *m/z* 125.0 (40%, PhSO), 77.0 (70, Ph) and 71.1 (100, C4H7O).

**(2*RS*, 3*SR*)-2-Methyl-1-[(1'-*S*-phenylsulfinyl)dimethyl]-3-toluene-*p*-sulfonyl pentan-1-ol *anti*-75**

In the same way as the sulfide **14**, the sulfone *anti*-**74** (50 mg, 0.19 mmol) and toluene-*p*-sulfonyl chloride (43 mg, 0.19 mmol) in pyridine (1 ml) gave, after flash column chromatography on silica gel eluting with ether the *tosylate* *anti*-**75**(76 mg, 95 %) as a colourless oil; *R*f [ether] 0.7; *v*max(film, CDCl3)/cm-1 3200 (OH); H(400 MHz, CDCl3) 7.85 (2 H, d, *J* 7.3, *o*-ArSO2), 7.75 (2 H, d, *J* 8.2, *o*-SO2Ph), 7.69 (1 H, t, *J* 7.4, *p*-SO2Ph), 7.59 (2 H, t, *J* 7.5, *p*-ArSO2), 7.35 (2 H, d, *J* 8.0, *m*-SO2Ph), 4.27 (1 H, dd, *J* 10.1 and 4.6, C*H*AHBO), 4.01 (1 H, t, *J* 2.6, C*H*OH), 3.87 (1 H, dd, *J* 10.1 and 7.6, CHA*H*BO), 3.59 (1 H, d, *J* 1.1, OH), 2.44 (3 H, s, CH3, Ar), 2.10 (1 H, m, C*H*CH3), 1.35 (3 H, s, CH3), 1.18 (3 H, s, CH3) and 1.05 (3 H, d, *J* 6.9, C*H*3CH); C(100 MHz, CDCl3) 144.8* (*i*-SO2Ar), 134.3* and 132.9* (*i*- SO2Ph and *i*-*C*CH3, Ar), 134.5 (*p*- SO2Ph), 130.5 (*o*- SO2Ph), 129.8 (*m*- SO2Ph), 129.0 (*o*- and *p*-SO2Ar), 127.9 (*m*-SO2Ar), 74.4 (CHOH), 71.6* (CH2O), 67.1* (*C*SO2Ph), 34.8 (*C*HCH3), 21.6, 20.5, 18.1 and 15.7 (4 × CH3); *m/z* 125.1 (50%, PhSO), 91.1 (90, Ar) and 77.0 (90, Ph) and 71.0 (100, C4H7O).

**Synthesis of the diol (2*SR*,4*RS*)-2,4-dihydroxy-4-[(1'-phenylsulfanyl) dimethyl] butane *anti*-76**

n-BuLi (8.46 ml, 1.3 M in hexanes, 11 mmol) Was added to diisopropylamine (1.41 g, 1.9 ml, 14 mmol) in THF (50 ml) at –78oC. The solution was stirred for 30 mins. Acetone (0.61 g, 0.77 ml, 10.5 mmol) in THF (3 ml) was added slowly to this solution. The solution was stirred for 30 mins. The 2-phenylsulfanyl-2-methyl propanal (1.8 g, 10 mmol) in THF (10 ml) was added slowly. The solution was stirred for a further 30 mins. Saturated NH4Cl (20 ml) was added and the solution was allowed to warm to room temperature. The solution was extracted with ether (3  100 ml). The combined organic layers were dried (MgSO4) and evaporated under reduced pressure. The residue was purified was flash column chromatography on silica gel eluting with light petroleum (40-60oC)-ether (9:1) to give 4-hydroxy-4-[(1'-phenylsulfanyl)dimethyl]-butan-2-one (2.17 g, 92 %) as an oil; *R*f [light petroleum (40-60oC)-ether (1:1)] 0.5; *v*max (film, CDCl3)/cm-1 3300 (OH) and 1715 (CO); H (200 MHz, CDCl3) 7.59-7.29 (5 H, m, SPh), 3.72 (1 H, dd, *J* 9.7 and 2.2, C*H*OH), 3.25-3.10 (1 H, broad s, OH), 2.61 (1 H, ABX, *J* 16.4 and 4.4, C*H*AHB), 2.67 (1 H, ABX, *J* 16.4 and 10.9, CHA*H*B), 2.22 (3 H, s, CH3CO), 1.26 (3 H, s, CH3) and 1.20 (3 H, s, CH3); C (50 MHz, CDCl3) 208.6 (CO), 137.4 (*m*-SPh), 130.9 (*i*-SPh), 129.1 (*p*-SPh), 128.6 (*o*-SPh), 72.1 (CHOH), 53.0 (*C*SPh), 44.6 (*C*H2CO), 30.6 (*C*H3CO), 24.5 (CH3) and 23.9 (CH3); *m/z* 238.1 (100%, M), 220.1 (30, M — H2O) and 151.1 (70, C3H6SPh).

LiAlH4 (37 mg, 0.99 mmol) Was added to a stirred solution of the above ketone (0.1 g, 0.42 mmol) in ether (100 ml) at 0oC. The solution was stirred for 2 hours and poured onto an ice/brine solution. NaOH (20 ml, 10%) was added and the solution was extracted with ether (3  100 ml). The combined organic layers were dried (MgSO4) and evaporated under reduced pressure. The residue was purified by flash column chromatography on silica gel eluting with light petroleum (40-60oC)-ether (1:1) to give a separable diastereoisomeric mixture (66:33, *syn*:*anti*) of the *syn*-*diol* **76**(62 mg, 61 %) as an oil; *R*f [light petroleum (40-60oC)-ether (1:1)] 0.2; *v*max (film, CDCl3)/cm-1 3500-3300 (OH); H (200 MHz, CDCl3) 7.54-7.25 (5 H, m, SPh), 4.03-3.87 (1 H, m, C*H*CH3), 3.87-3.50 (2 H, broad s, 2 × OH), 3.54 (1 H, dd, *J* 9.8 and 2.9, C*H*OH), 1.68-1.39 (2 H, m, CH2), 1.27 (3 H, s, CH3), 1.18 (3 H, s, CH3) and 1.16 (3 H, d, *J* 5.9, C*H*3CH); C (50 MHz, CDCl3) 137.4 (*m*-SPh), 130.0 (*i*-SPh), 129.2 (*p*-SPh), 128.7 (*o*-SPh), 76.0 (CHOH), 66.4 (CHOH), 54.6 (*C*SPh), 38.1 (CH2), 25.4, 23.6 and 21.9 (3 × CH3) (Found M+, 240.1178. C13H20O2S requires M, 240.1183); *m/z* 240.1 (35%, M), 151.1 (100, C3H6SPh), 110.0 (60, PhSH) and 71.1 (45, C4H7O); and the *anti*-*diol* **76** (31 mg, 30.7 %) as an oil; *R*f [light petroleum (40-60oC)-ether (1:1)] 0.1; *v*max(film, CDCl3)/cm-1 3450-3300 (OH); H(200 MHz, CDCl3) 7.58-7.34 (5 H, m, SPh), 4.20-4.05 (1 H, m, C*H*CH3), 3.67 (1 H, dd, *J* 9.8 and 3.0, C*H*OH), 3.29-3.17 (1 H, broad s, OH), 2.55-2.20 (1 H, broad s, OH), 1.74-1.45 (2 H, m, CH2), 1.24 (3 H, s, CH3), 1.22 (3 H, d, *J* 6.3, C*H*3CH) and 1.18 (3 H, s, CH3); C(50 MHz, CDCl3) 137.4 (*m*-SPh), 130.1 (*i*-SPh), 129.2 (*p*-SPh), 128.7 (*o*-SPh), 71.7 (CHOH), 65.5 (CHOH), 55.1 (*C*SPh), 38.2 (CH2), 25.6, 23.3 and 22.4 (3 × CH3) (Found M+, 240.1185. C13H20O2S requires M, 240.1183); *m/z* 240.1 (5%, M), 151.1 (100, C3H6SPh), 110.0 (65, PhSH) and 71.1 (50, C4H7O).

**Tosylation of diol *anti*-76**

In the same way as the sulfide **14**, the diol *anti*-**76** (85 mg, 0.35 mmol) and toluene-*p*-sulfonyl chloride (73.6 mg, 0.35 mmol) in pyridine (1 ml) gave, after flash column chromatography on silica gel eluting with light petroleum (40-60 oC)-ether (1:1) an inseparable regioisomeric mixture (82:12, A:B) of the *tosylate anti*-**77**A and *tosylate* *anti*-**78**B (0.13 g, 96 %) as a colourless oil; *R*f [light petroleum (40-60 oC)-ether (1:1)] 0.4; *v*max(film, CDCl3)/cm-1 3300 (OH); H(200 MHz, CDCl3) 8.12-7.10 (18 H, m, SPhA+B and SO2ArA+B), 5.00-4.80 (1 H, m, C*H*CH3A), 4.65-4.61 (1 H, m, CHOB), 3.42 (1 H, dd, *J* 11.0 and 2.0, C*H*OHA), 3.35-3.15 (3 H, m, C*H*CH3B and 2 × OH), 2.43 (3 H, s, CH3, SO2ArA), 2.31 (3 H, s, CH3B), 2.04-1.80 (1 H, m, C*H*AHBA), 1.70 (3 H, s, CH3B), 1.68 (3 H, d, *J* 7.3, C*H*3CHB), 1.65-1.42 (1 H, m, CHA*H*BA), 1.35 (3 H, s, CH3B), 1.30-1.10 (4 H, m, 2 × CH2A), 1.26 (3 H, d, *J* 7.5, C*H*3CHA), 1.19 (3 H, s, CH3A) and 1.10 (3 H, s, CH3A); C(100 MHz, CDCl3) 141.5*, 139.2*, 132.0, 129.0, 128.9, 127.5, 126.3 and 121.4* (SPhA and SO2ArA), 80.2 (*C*HCH3A), 63.2 (CHOHA), 56.3* (*C*SPhA), 47.2* (CH2A), 21.4, 21.0, 17.9 and 17.9 (4 × CH3A); *m/z* 285.0 (100%, M – SO2Ph).

1. † The remaining OH signal in the proton NMR could not be detected between 0-10 ppm. [↑](#footnote-ref-2)
2. † The remaining OH signal in the proton NMR could not be detected between 0-10 ppm. [↑](#footnote-ref-3)
